# Supplementary material for: Perioperative medication management: expanding the role of the preadmission clinic pharmacist in a single centre, randomised controlled trial of collaborative prescribing
Source: PubMed Central journal article supplement — BMJ Open. 2013 Jul 11;3(7):e003027. doi: 10.1136/bmjopen-2013-003027 (PMC3710977; doi:10.1136/bmjopen-2013-003027), 2013-07-11
Supplement: bmjopen-2013-003027.draft_revisions.pdf [file bmjopen-2013-003027.draft_revisions.pdf]

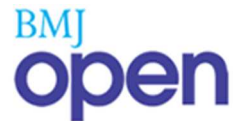

**Perioperative Medication Management–Expanding the Role  
of the Pre Admission Clinic Pharmacist in a Single Centre,  
Randomised Controlled trial of Collaborative Prescribing**

|                                    |                                                                                                                                                                                                                                                                                                                                                                                                                                                                                                       |
|------------------------------------|-------------------------------------------------------------------------------------------------------------------------------------------------------------------------------------------------------------------------------------------------------------------------------------------------------------------------------------------------------------------------------------------------------------------------------------------------------------------------------------------------------|
| Journal:                           | <i>BMJ Open</i>                                                                                                                                                                                                                                                                                                                                                                                                                                                                                       |
| Manuscript ID:                     | bmjopen-2013-003027.R1                                                                                                                                                                                                                                                                                                                                                                                                                                                                                |
| Article Type:                      | Research                                                                                                                                                                                                                                                                                                                                                                                                                                                                                              |
| Date Submitted by the Author:      | 24-May-2013                                                                                                                                                                                                                                                                                                                                                                                                                                                                                           |
| Complete List of Authors:          | Hale, Andrew; princess Alexandra Hospital, Pharmacy<br>Coombes, Ian; Royal Brisbane and Women's Hospital, Pharmacy<br>Department,<br>Stokes, Julie; Queensland Health, Medicines Regulation and Quality<br>McDougall, David; Princess Alexandra Hospital, Pharmacy<br>Whitfield, Karen; University of Queensland, Pharmacy Centre of Excellence<br>Maycock, Elizabeth; Princess Alexandra Hospital, Anaesthetics<br>Nissen, Lisa; Queensland University of Technology, School of Clinical<br>Sciences |
| <b>Primary Subject<br>Heading</b>: | Surgery                                                                                                                                                                                                                                                                                                                                                                                                                                                                                               |
| Secondary Subject Heading:         | Surgery, Health services research                                                                                                                                                                                                                                                                                                                                                                                                                                                                     |
| Keywords:                          | Health & safety < HEALTH SERVICES ADMINISTRATION & MANAGEMENT,<br>Risk management < HEALTH SERVICES ADMINISTRATION &<br>MANAGEMENT, Adult surgery < SURGERY                                                                                                                                                                                                                                                                                                                                           |
|                                    |                                                                                                                                                                                                                                                                                                                                                                                                                                                                                                       |

SCHOLARONE™  
Manuscripts

**Perioperative Medication Management—Expanding the Role of the Pre Admission Clinic Pharmacist in a Single-Centre, Randomised Controlled Trial of Collaborative Prescribing**

Corresponding Author:

Mr A R Hale

Senior Pharmacist, Pre Admission Clinic  
Princess Alexandra Hospital  
Brisbane, 4102,  
Qld, Australia  
Phone 00617 31767848  
Fax 00617 31767122  
E-mail address:  
andrew\_hale@health.qld.gov.au

Contact Address:  
87 Norfolk Street,  
Coorparoo,  
Brisbane, 4151

A/Prof I D Coombes, PhD  
Director,  
Pharmacy Department, Royal Brisbane and Womens Hospital,  
Brisbane, 4029  
Qld, Australia

Dr J Stokes, PhD  
Consultant Pharmacist,  
Medicines Regulation and Quality, Queensland Health,  
Locked Bag 21, Fortitude Valley,  
Brisbane, 4006  
Qld, Australia

Mr D McDougall  
Senior Pharmacist,  
Princess Alexandra Hospital,  
Brisbane, 4102,  
Qld, Australia

Dr K Whitfield, PhD  
Senior Lecturer,  
School of Pharmacy, Pharmacy Australia Centre of Excellence, The University of Queensland,  
Brisbane, 4102  
Qld, Australia

Dr E Maycock  
Consultant Anaesthetist,  
Princess Alexandra Hospital.  
Brisbane, 4102,  
Qld, Australia

Prof L Nissen, PhD  
Professor (Head), School of Clinical Sciences  
Queensland University of Technology (QUT)  
Brisbane, 4000  
Qld, Australia

1  
2  
3 Keywords: Allied health, Pharmacy, Non-medical prescribing, Pharmacist prescribing, Safe  
4 prescribing  
5

6 Word Count :

7  
8 Abstract 271  
9

10 Main text 3182  
11

## 12 Article Summary

### 13 Article Focus

- 14 • A doctor-pharmacist collaborative prescribing model provides as least as high a quality of  
15 care as usual care, with regards to safety, access, appropriateness, effectiveness, efficiency  
16 and consumer participation  
17
- 18 • Workforce shortages are prompting a review of the way that the current workforce is utilised,  
19 and whether different roles could be taken on by healthcare professionals to alleviate some of  
20 the pressures within the system.  
21
- 22 • Research on non medical prescribing so far is predominantly qualitative in nature. Our study  
23 has analysed quantitative data on safety, accuracy and appropriateness of prescribing to try  
24 and assess whether this model is at least as good as usual care.  
25  
26  
27  
28  
29  
30  
31

### 32 Key Messages

- 33 • Pharmacists' skills in medication management are currently underutilised, and with  
34 appropriate training and education they could be contributing to medication management  
35 much more effectively by taking on a prescribing role.  
36
- 37 • The prescribing is collaborative, and driven by guidelines and under the supervision of a  
38 medical team. Diagnosis is not within the scope of practice of the prescribing pharmacist.  
39
- 40 • This model of care has been proved to be highly effective in this study, with an increased  
41 accuracy, safety and appropriateness of prescribing within the intervention arm  
42  
43  
44  
45  
46  
47

### 48 Strengths and Limitations

- 49 • The results, with regards to accuracy and safety of medication charts produced in the study  
50 are emphatic and statistically significant.  
51
- 52 • The intervention is reproducible in other setting with a pharmacist of appropriate experience,  
53 training and education.  
54  
55  
56  
57  
58  
59  
60

1  
2  
3  
4  
5  
6  
7  
8  
9  
10  
11  
12  
13  
14  
15  
16  
17  
18  
19  
20  
21  
22  
23  
24  
25  
26  
27  
28  
29  
30  
31  
32  
33  
34  
35  
36  
37  
38  
39  
40  
41  
42  
43  
44  
45  
46  
47  
48  
49  
50  
51  
52  
53  
54  
55  
56  
57  
58  
59  
60

- The study assessed one pharmacist prescriber versus a cohort of medical prescribers. While this has been accounted for in the analysis, this reflects what usual practice would be in a model care such as this. The authors recognise and acknowledge it as a limitation.

For peer review only

1  
2  
3 **Perioperative Medication Management—Expanding the Role of the Pre Admission Clinic**  
4 **Pharmacist in a Single Centre, Randomised Controlled Trial of Collaborative Prescribing**  
5

6 **ABSTRACT**  
7

8 **Objectives:** Current evidence to support non-medical prescribing is predominantly qualitative, with  
9 little evaluation of accuracy, safety and appropriateness. Our aim was to evaluate a new model of  
10 service for the Australia healthcare system, of inpatient medication prescribing by a pharmacist in an  
11 elective surgery pre admission clinic (PAC) against usual care, using an endorsed performance  
12 framework.  
13  
14  
15  
16  
17

18 **Design:** Single centre, randomised controlled, two arm trial  
19

20 **Setting:** Elective surgery pre admission clinic in Brisbane based tertiary hospital  
21

22 **Participants:** Four hundred adults scheduled for elective surgery were randomised to intervention or  
23 control.  
24  
25  
26  
27

28 **Intervention:** A pharmacist generated the inpatient medication chart to reflect the patient's regular  
29 medication, made a plan for medication perioperatively and prescribed VTE prophylaxis.  
30  
31

32 In the control arm, the medication chart was generated by the Resident Medical Officers (RMO).  
33  
34

35 **Outcome Measures:** Primary outcome was frequency of omissions and prescribing errors when  
36 compared against the medication history. The clinical significance of omissions was also analysed.  
37  
38

39 Secondary outcome was appropriateness of VTE prophylaxis prescribing.  
40  
41

42 **Results:** There were significantly less unintended omissions of medications: 11 of 887 (1.2%)  
43 intervention orders compared with 383 of 1217 (31.5%) control ( $p < 0.001$ ).  
44  
45

46 There were significantly less prescribing errors involving selection of drug, dose or frequency: 2 in 857  
47 (0.2%) intervention orders compared with 51 in 807 (6.3%) control ( $p < 0.001$ ).  
48  
49

50 Orders with at least one component of the prescription missing, incorrect or unclear occurred in 208 of  
51 904 (23%) intervention orders and 445 of 1034 (43%) control ( $p < 0.001$ ).  
52  
53  
54  
55  
56  
57  
58  
59  
60

1  
2  
3 VTE prophylaxis on admission to the ward was appropriate in 93% of intervention patients and 90%  
4 control (p=0.29).  
5  
6

7 **Conclusion:** Medication charts in the intervention arm contained fewer clinically significant omissions,  
8 and prescribing errors, when compared to control.  
9  
10

11 There was no difference in appropriateness of VTE prophylaxis on admission between the two  
12 groups.  
13  
14

15  
16 **Trial Registration:** Registered with ANZCTR – ACTR Number ACTRN12609000426280  
17  
18  
19  
20  
21  
22  
23  
24  
25  
26  
27  
28  
29  
30  
31  
32  
33  
34  
35  
36  
37  
38  
39  
40  
41  
42  
43  
44  
45  
46  
47  
48  
49  
50  
51  
52  
53  
54  
55  
56  
57  
58  
59  
60

## INTRODUCTION

Prescribing involves four stages; information gathering, clinical decision making, communication of decision and monitoring.[1] Taking a medication history, continuing, ceasing and withholding of medications, and initiating new medications are critical components of prescribing associated with an admission for surgery. Medication errors are common, occur most often at the time of prescribing, and frequently on the day of hospital admission, resulting in discrepancies between regular medications and admission orders.[2-4] A small, but significant, proportion of errors result in adverse drug events (ADEs).[5] Errors have been defined as when there is “*a failure to communicate essential information; the use of drugs or doses is inappropriate for the individual patient; and transcription error.*”[6] To be able to communicate a clinical decision safely and effectively in the form of a written prescription, it is necessary for selection of the correct drug, together with the route, form, dose, frequency and duration.[7] Multiple interventions have been suggested in an attempt to improve prescribing, with suggestions that increased training of the individual, a controlled environment and a change in organisational culture are necessary.[8]

Within hospital, the medication chart provides instructions for safe medication supply and administration, and ensures patient access to medications as an inpatient. It is an integral part of communication between doctors, pharmacists and nurses about prescribing decision and is used as the primary source of information regarding medications on discharge. The pharmacy service in Princess Alexandra Hospital (PAH) PAC began in 1998, to provide timely, accurate and comprehensive information about medication as patients crossed between healthcare settings. It ensured accurate transfer of information at admission, during the inpatient stay and at discharge, the benefits of which were a reduction in both readmissions and contact with community healthcare providers post discharge.[9] The importance of accurate transfer of information across the whole surgical care pathway from preadmission to discharge, including information about medications, has been highlighted in a recent study that reported communication failures led to patient morbidity and mortality. Standardisation and systemisation of communication processes, along with other interventions targeted at the entire surgical pathway were recommended, with a view to improving information transfer and quality of care.[10]

Pharmacists in pre admission clinics (PAC) have been shown to improve the accuracy of medication histories and medication orders, when compared to standard care, and the efficacy of prescribing

1  
2  
3 perioperatively in line with recognised guidelines.[11,12] Only with an accurate history of medication  
4 usage can decisions be made safely regarding management of medications perioperatively.

5  
6 Medication histories are elicited from a variety of sources of information; patient's own medications,  
7 the patient or carer, GP summaries, community pharmacies, previous hospital admissions and  
8 nursing home records. A number of sources may be consulted to build an accurate record of  
9 medication that the patient is taking, both regularly and occasionally.

10  
11 The range of prescribers has been expanded in a number of countries, with changes in legislation to  
12 allow for extension of prescribing privileges to non-medical professionals, including pharmacists. The  
13 objective of this was to make greater use of the skills and specialisation of pharmacists so that a more  
14 flexible system for the prescribing, supply and administration of medicines could be developed, whilst  
15 maintaining safe and appropriate access to medicines .[13,14]

16  
17 In response to documented workforce shortages in Australia, Brooks *et al* described possible  
18 solutions, including 'task substitution', and a focus has been placed recently on non-medical  
19 prescribers within the healthcare system.[15-19] Pharmacists, with training in pharmacology and  
20 therapeutics, are potentially well placed to undertake prescribing roles. An Australian study identified  
21 the main driver behind pharmacist prescribing as the desire to work collaboratively with medical and  
22 nursing staff to:

- 23  
24  
25  
26  
27  
28  
29  
30  
31  
32  
33  
34  
35  
36  
37  
38  
39  
40  
41  
42  
43  
44  
45  
46  
47  
48  
49  
50  
51  
52  
53  
54  
55  
56  
57  
58  
59  
60
- provide consumers with improved, responsible and safe access to prescription medicines
  - optimise use of pharmacists' and doctors' skills and time
  - reduce inefficient use of health resources.[20]

Evidence to support non-medical prescribing so far has been mainly qualitative, with minimal  
evaluation of access, safety and appropriateness. One recent review concluded acceptability of non-  
medical prescribing services is based on the perceived value to the health service.[21] This lack of  
evidence has led to calls to prove the safety and effectiveness of non-medical prescribing services in  
Australia.[22] The aim of the data analysis discussed in this paper was to compare a doctor –  
pharmacist collaborative prescribing model with usual care, with regards to safety, access,  
appropriateness and effectiveness; the null hypothesis being that no difference exists between the  
two models of care.[23]

## METHODS



1  
2  
3 The study was conducted between June to September 2009 in the surgical PAC at PAH, a 750 bed  
4 tertiary teaching hospital in Queensland.

5  
6  
7 Ethics approval was obtained from the PAH Human Research Ethics Committee.

8  
9 The definition of error used in the study was:

10  
11 *“a failure to communicate essential information; the use of drugs or doses is inappropriate for the*  
12 *individual patient; and transcription error.”*[3]

13  
14  
15 All patients who attended PAC and could provide written, informed consent were considered for  
16 participation. Patients were excluded if they were under 18 years of age, unable to communicate due  
17 to language difficulties or undergoing day surgery (see Figure 1)

18  
19  
20 Patients were approached on arrival at clinic and written consent was obtained. After consent,  
21 patients were randomised using a computer generated randomisation list, in blocks of ten (Microsoft  
22 Excel). Sealed envelopes (not prepared by the recruiting researcher) contained a zero or one as per  
23 the computer list; the next envelope was opened after consent to determine whether a patient entered  
24 the control or intervention arm respectively. If a patient had been randomised, and surgery cancelled  
25 during PAC, the patient was removed from the study and not replaced.

26  
27  
28 A previous pilot study in PAC showed an error rate of 12% of orders.[24] Using an expected error rate  
29 of 8% in the intervention arm a sample size of 932 orders per group was calculated to be required for  
30 a power of 80%. Assuming an average of 5 orders per patient, approximately 200 patients per arm  
31 would be required.

32  
33  
34 Only one pharmacist in PAC, with three years' experience as a hospital pharmacist and having a  
35 postgraduate diploma in clinical pharmacy, was trained to be a prescriber. The pharmacist attended a  
36 prescribing course which was accredited by the General Pharmaceutical Council, UK as an  
37 Independent Pharmacist Prescribing Course.[25]

38  
39  
40 Training included a minimum of 12 days of 'period of learning in practice' under a 'designated medical  
41 practitioner' (DMP), who was the consultant anaesthetist for PAC. The training included case studies  
42 and sessions on venous thromboembolism (VTE) prophylaxis with a consultant vascular physician  
43 and the clinical nurse consultant (CNC) for VTE prophylaxis at PAH. The DMP endorsed the  
44 pharmacist's competency to prescribe before the study could commence.

1  
2  
3 For the pilot, an amendment was facilitated to the *Queensland Health (Drugs and Poisons)*  
4 *Regulation 1996* to allow 'Pharmacists registered in Queensland who are employed or contracted to  
5 Queensland Health and working in the Pharmacist Prescribing Pilot' to prescribe controlled drugs,  
6 restricted drugs and Schedule 2 and 3 poisons.  
7  
8  
9

### 10 **Intervention Cohort**

11  
12 Patients were seen by a nurse, prescribing pharmacist, Resident Medical Officer (RMO) and  
13 anaesthetist. Patients had to be seen by the pharmacist before they were seen by the RMO to allow  
14 usual RMO duties and a countersignature of the pharmacist prescriptions, a site requirement.  
15  
16  
17

18 The pharmacist undertook all pharmacist duties as per usual care, as well as prescribing medications  
19 on the medication chart. The scope of prescribing was continuing or withholding regular medications  
20 and prescribing VTE prophylaxis according to local and national guidelines, following a risk and  
21 contraindication assessment.[26]  
22  
23  
24  
25  
26

27 Directors of surgery were consulted prior to commencement of the trial for permission to include  
28 patients in prescribing of VTE prophylaxis, according to their specific unit guidelines, which had been  
29 defined in advance in collaboration with the CNC for VTE prophylaxis at PAH. Urology and renal  
30 transplant patients were excluded (N=43 control, N=34 intervention) from VTE prophylaxis prescribing  
31 as the director of urology was unavailable to confirm the scope of the project, and the director for  
32 transplant requested exclusion on the grounds that VTE prophylaxis in these patients being more  
33 consultant discretion as opposed to guideline driven.  
34  
35  
36  
37  
38  
39

### 40 **Control Cohort**

41  
42 Patients were seen by all four health care professionals in clinic, in no particular order, as per usual  
43 care. Either pharmacist in the clinic saw control patients for documentation of medication history. The  
44 prescribing of the medication chart was the responsibility of the RMO. In both arms, review and  
45 monitoring was undertaken, both by the RMOs in clinic at countersignature and by RMOs and clinical  
46 pharmacists at a ward level once the patient was admitted. Changes made by RMOs to intervention  
47 patient medication charts in clinic were recorded.  
48  
49  
50  
51  
52  
53

### 54 **Outcome Measures**

The primary endpoint for the study was the accuracy of medication charts, with regards to concordance of the medication chart with the medication history, the plan for medications perioperatively and the quality of the individual orders related to legality and safety for administration purposes. The secondary endpoint was the appropriateness of prescribing for both chemical and mechanical VTE prophylaxis according to local and national guidelines.[26]

Analysis of scanned copies of medication charts, for the primary outcomes of omissions and errors, was conducted in tandem by two assessors; one member of the research team and one external assessor, both trained in use of the validated audit tools<sup>1</sup> and blinded to randomisation. Any ambiguities were clarified by consensus.

Appropriateness of VTE prophylaxis prescribed in both arms in clinic was analysed, using scanned copies of medication charts, in tandem by two assessors; one member of the research team and the Clinical Nurse Consultant (CNC) for VTE prophylaxis at PAH. Prescribing was also assessed on admission to the ward to ensure VTE prophylaxis was appropriate.

An expert panel, comprising of a surgeon, clinical pharmacologist, anaesthetist, RMO, pharmacist and a nurse, was convened to assess the clinical significance of omissions in a randomly selected 5% sample of the total cohort of patients from both arms (N=10 control, N=9 intervention). Panel members were blinded to randomisation.

Tables 1 and 2 describe the collection methods and definitions of these endpoints.

**Table 1 – Analysis to assess accuracy and safety of medication charts generated in the study**

| Measure   | Definition    | Method | Assessing      |
|-----------|---------------|--------|----------------|
| Omissions | Medication in | Every  | Whether or not |

|                      |                                                                                                                                       |                                                                                                                     |                                                                                                    |
|----------------------|---------------------------------------------------------------------------------------------------------------------------------------|---------------------------------------------------------------------------------------------------------------------|----------------------------------------------------------------------------------------------------|
|                      | patient's medication history not prescribed on medication chart, with no reason documented in patient chart                           | medication in patient's medication history checked against medication chart - omissions from medication chart noted | medication is prescribed                                                                           |
| Prescribing Errors   | Anomaly in drug name, strength, dose, frequency or route, with no documentation in patient chart                                      | Every medication in patient's medication history checked against medication chart – anomalies noted                 | Whether or not prescription is accurate in terms of drug name, strength, dose, frequency and route |
| Communication Errors | Unclear prescription in terms of name, route, dose, frequency, slow release medication notification or intermittent order prescribing | Every prescription written checked using validated tool – unclear prescribing noted, as agreed by both researchers  | Whether or not prescription is safe for administration purposes                                    |

**Table 2 – Analysis to assess accuracy of VTE risk and contraindication assessments and appropriateness of VTE prescribing**

| Measure                         | Definition                                                                                     | Method                                                                                                      | Assessing                                                                              |
|---------------------------------|------------------------------------------------------------------------------------------------|-------------------------------------------------------------------------------------------------------------|----------------------------------------------------------------------------------------|
| VTE Risk Assessment             | Patient categorised in to low or high risk for VTE, as per guidelines                          | Every patient medical record checked for a documented VTE risk assessment                                   | Risk assessment documented Y/N<br>Risk assessment correct Y/N                          |
| VTE Contraindication Assessment | Patient highlighted as inappropriate for mechanical or chemical prophylaxis, as per guidelines | Every patient medical record checked for a documented contraindication assessment                           | Contraindication assessment documented Y/N<br>Contraindication assessment correct Y/N  |
| VTE prescribing                 | Whether patient prescribed mechanical and/or chemical VTE prophylaxis, as per guidelines       | Prescribing of mechanical and chemical VTE prophylaxis checked against agreed local and national guidelines | VTE prescribing appropriate according to guidelines and individual patient factors Y/N |

Categorical data was compared using chi-square tests for independence. When any one cell had a count of less than ten Fisher's exact test was substituted. Logistic regression was used to analyse the overall omissions between the two groups. The number of regular and 'prn' medications the patient was currently taking was included as an explanatory variable in the model as it was deemed more likely an individual medication would be omitted in a patient taking a large number of medications. Logistic regression was also used to analyse the overall communications prescribing errors between the two groups. The assumption of independence between observations is clearly violated as multiple observations exist for most subjects. As such, robust standard errors clustered by patient were calculated. No other covariates were adjusted for. All reported p values are two-sided using a level of significance of 0.05. All statistical analysis and sample size calculations was conducted using Stata 11.2 (StataCorp, College Station, Tx).

## RESULTS

**Table 3 Characteristics of Study Population**

The demographics of the patients randomised in to the trial were similar, except for the higher number of medications taken by patients in the control arm (See Table 3)

|                                                 | Control      | Intervention |
|-------------------------------------------------|--------------|--------------|
| Total Patients                                  | 190          | 194          |
| Age ‡                                           | 57.6 [18-89] | 55.8 [18-86] |
| Male (%)                                        | 58%          | 59%          |
| *Regular Medications†                           | 4[0-16]      | 3[0-18]      |
| #When Required 'PRN' Medications†               | 2[0-7]       | 1[0-4]       |
| Complementary and Alternative Medicines (CAM) † | (0)[0-9]     | (0)[0-6]     |
| Over The Counter (OTC) Medications†             | (0)[0-2]     | (0)[0-2]     |
| Total Medications                               | 1364         | 983          |
| Total medications (regular and prn only)        | 1217         | 887          |
| Medication Charts Prescribed                    | 161 (85%)    | 194 (100%)   |

‡ mean [range]

† median [range]

\*Regular medications are defined as medications prescribed with the intent to be taken on a regular basis

#Pro Re Nata (PRN) medications are defined as medications prescribed with the intent to be taken only when required

### Omissions

Total unintentional medication omissions from medication charts was higher for control patients (31.5%) compared to intervention (1.2%) The odds ratio for an order in the control group to be omitted, compared to the intervention group was 41.0 (95% CI 20.6 – 81.8) ( $p < 0.001$  logistic regression) after adjusting for the number of medications the patient was currently taking. (see Table

1  
2  
3 4 and Figure 2) There were 59 prescribers in the control arm, 54 of whom reviewed patients who were  
4 currently taking regular or PRN medications at home, and as such had the opportunity to omit a  
5 patient's medication. Out of these 54 prescribers, the median percentage of medications that were  
6 omitted per prescriber in the control arm was 21 (range 0 - 100).  
7  
8  
9  
10  
11  
12  
13  
14  
15  
16  
17  
18  
19  
20  
21  
22  
23  
24  
25  
26  
27  
28  
29  
30  
31  
32  
33  
34  
35  
36  
37  
38  
39  
40  
41  
42  
43  
44  
45  
46  
47  
48  
49  
50

51 **Table 4: Medication omissions from medication chart**

| Type of Medication and Perioperative Plan | Control (N)[%]  | Intervention(N)[%] |
|-------------------------------------------|-----------------|--------------------|
| <b>Regular</b>                            |                 |                    |
| Continue                                  | 179 (805)[22.2] | 3 (620)[0.5]       |

|                                                        |                 |              |
|--------------------------------------------------------|-----------------|--------------|
| Withhold prior to surgery                              | 46(75)[7.4]     | 0(48)        |
| Withhold on morning of surgery                         | 21(54)[38.9]    | 0(39)        |
| Adjust dose                                            | 1(5)[20.0]      | 0(5)         |
| Review                                                 | 1(7)[14.2]      | 0(6)         |
| Cease                                                  | 0(1)            | 0(2)         |
| <b>PRN</b>                                             |                 |              |
| Continue                                               | 128(248)[51.6]  | 6(142)[4.2]  |
| Withhold prior to surgery                              | 7(12)[58.3]     | 2(13)[15.4]  |
| Adjust dose                                            | 0(2)[20.0]      | 0(1)         |
| Review                                                 | 0(8)[14.3]      | 0(11)        |
| <b>Total Omissions</b>                                 | 383(1217)[31.5] | 11(887)[1.2] |
| <b>*Complementary and Alternative Medicines (CAMs)</b> | 126             | 87           |
| <b>*Over The Counter Medications (OTC)</b>             | 21              | 9            |

\*CAM and OTC medications were not classed as omissions in either arm if not prescribed on the inpatient medication chart

#### Clinical Significance of Omissions



1  
2  
3 Omissions from a randomly selected 5% of the total cohort were evaluated for clinical significance.  
4  
5 Out of 89 regular medication in the patients' medication histories in the control arm, 25 (28%) were  
6  
7 omitted from the medication charts, compared to 1 out of 55 (2%) in the control arm . When asked to  
8  
9 assess the severity of omission, the average across the panel showed 52% of omissions in the  
10  
11 control arm had the potential for patient harm or ward inconvenience (see Figure 3) Only one reviewer  
12  
13 thought the omission in the intervention arm was significant.

### 14 15 **Prescribing Errors Related to Drug, Dose and Frequency Selection**

16  
17 Overall, 53 errors were identified where the drug strength, dose or frequency prescribed did not match  
18  
19 the medication history or perioperative plan (see Figure 4). This equates to 4.9% of control orders  
20  
21 compared to 0.2% of intervention orders ( $p < 0.001$ , Fisher's exact).

### 22 23 **Communication Errors**

24  
25 Communication errors, where prescriptions were rated as ambiguous or unclear, were significantly  
26  
27 higher in the control arm compared to the intervention arm. The odds ratio for an order in the control  
28  
29 arm to have a communication error compared to an order in the intervention arm was 2.52 (95%CI  
30  
31 1.96 – 3.27) (logistic regression  $p < 0.001$ ). As there were multiple orders per patient, robust standard  
32  
33 errors, clustered by patient were utilised(see Table 5). Individually, communication errors were  
34  
35 significantly higher in the control arm for all types of error except route of administration ( $p = 0.57$  chi-  
36  
37 square).

38  
39 From the control arm prescribers, 44 of them prescribed medication on the medication charts, with a  
40  
41 median number of orders of 21 (range 1 - 85). The median percentage of orders in the control arm  
42  
43 that contained at least one communication error per prescriber was 38 (range 0 - 100).  
44  
45  
46  
47  
48  
49  
50  
51  
52  
53  
54  
55  
56  
57  
58  
59  
60

**Table 5: Prescribing errors with an ambiguity in at least one component of the prescription**

|                                                 | Control<br>Number of errors<br>(% of total orders) | Intervention<br>Number of errors<br>(% of total orders) | P value        |
|-------------------------------------------------|----------------------------------------------------|---------------------------------------------------------|----------------|
| Total Orders                                    | 1034                                               | 904                                                     |                |
| Orders with at Least One<br>Communication Error | 445(43)                                            | 208(23)                                                 | <0.001 $\Pi$ † |
| Prescribing<br>Communication Errors             | 667                                                | 229                                                     |                |
| Prescribing Communication Errors                |                                                    |                                                         |                |

|                                           |                            |                           |         |
|-------------------------------------------|----------------------------|---------------------------|---------|
| Drug name                                 | 23 (2.1)                   | 0                         | <0.001‡ |
| Route                                     | 79 (7.6)                   | 76 (8.4)                  | 0.57†   |
| Dose                                      | 48 (4.6)                   | 5 (0.6)                   | <0.001‡ |
| Frequency                                 | 190 (18.4)                 | 96 (10.6)                 | <0.001‡ |
| Administration times incorrect or missing | 117 (14.9)<br>(781 orders) | 4 (0.5%)<br>(762 orders)  | <0.001‡ |
| prn max dose missing                      | 178 (74.5)<br>(241 orders) | 47 (32.6)<br>(142 orders) | <0.001‡ |
| Slow Release not specified                | 15 (30.0)<br>(50 orders)   | 1 (1.5)<br>(66 orders)    | <0.001‡ |
| Intermittent order not specified          | 17 (57.5)<br>(30 orders)   | 0<br>(38 orders)          | <0.001‡ |

Π Logistic regression

† Chi-Square

‡ Fisher's Exact

### Venous Thromboembolism (VTE) Prophylaxis

Patients in the intervention arm were significantly more likely than controls to have appropriate VTE prophylaxis prescribed on the medication chart in PAC and to have documented VTE assessment (see Figure 5). On admission to the ward, approximately 90% of both intervention and control patients were prescribed appropriate VTE prophylaxis.

### DISCUSSION

This study has built on the findings from previous research of pharmacist prescribing in PAC settings, which have found improved accuracy of information gathered, and improved prescribing according to

1  
2  
3 guidelines.[9,27] Similar studies of pharmacist interventions in different settings have shown  
4 improvements in clinical endpoints such as blood pressure control, increased appropriateness of  
5 prescribing and reductions in adverse drug events, such as warfarin associated bleeds.[28,29]  
6  
7

8 The traditional scope of practice for the PAC pharmacist consists of taking a medication history, using  
9 guidelines, clinical judgement and referral to the surgical team to suggest a plan for medications  
10 perioperatively, and providing this information for the RMOs to generate the medication charts. This  
11 scope has been extended in our study by providing an appropriately trained pharmacist to generate  
12 the medication chart and prescribe VTE prophylaxis, which has led to a significant reduction in  
13 omissions and prescribing errors, ensuring patients get the correct medication whilst in hospital. The  
14 evaluation of VTE prophylaxis prescribing was essential to assess the safety and appropriateness of  
15 initiation of a new medication, within guidelines, by the prescribing pharmacist. The results from this  
16 study have shown the prescribing to be as appropriate as usual care at the time the patient is  
17 admitted to the ward. Issues still remain with the prescribing, especially with the use of inappropriate  
18 abbreviations.[30] For example, a large proportion of communication errors in the intervention arm  
19 were due to the use of s/c to indicate subcutaneous, which has informed the researchers on future  
20 educational requirements of prescribers, especially with regards to safe prescribing.  
21  
22

23 Electronic prescribing may be one solution to such errors involving legibility and inappropriate  
24 abbreviations, but studies have shown the systems introduce errors of their own.[31] These errors  
25 need to be fully assessed and appreciated if the quality of prescribing is to be improved by the  
26 introduction of computerised prescribing in to the healthcare system.  
27  
28

29 The results presented in this paper are part of a larger study, further work is required to assess the  
30 appropriateness of prescribing of medication charts and consumer participation of this new model of  
31 care.[23] There are a number of limitations. Even though the trial was randomised, the total number of  
32 medications patients were taking was higher in the control arm (1364) compared to the intervention  
33 arm (983). The explanation for this is unknown but may in part be due to large randomisation block  
34 sizes, possibly meaning a number of consecutive patients were randomised to the control arm during  
35 clinic sessions where patients were more likely to have a higher burden of medication, for example  
36 during a vascular surgery clinic. There was more opportunity for omissions from the control arm as a  
37 result of more medications needing to be continued, and this was allowed for in the analysis.  
38  
39  
40  
41  
42  
43  
44  
45  
46  
47  
48  
49  
50  
51  
52  
53  
54  
55  
56  
57  
58  
59  
60

1  
2  
3 RMOs in clinic during the study were aware of the intervention pharmacist's role, which may have led  
4 to an increased number and quality of medication charts prescribed in the control arm. Even with this  
5 potential effect, the study still showed a significant improvement in the safety and accuracy of  
6 medication charts.  
7  
8  
9

10 Review of medication orders is not a role a RMO routinely undertakes. All RMOs were educated with  
11 regards to the requirement for a countersignature of pharmacist orders, and to amend anything as  
12 required prior to sign off. In the trial, 10 charts were amended – 5 changes were minor, 3 were  
13 addition of analgesics out of the pharmacist's prescribing scope and two changes actually resulted in  
14 inappropriate VTE prophylaxis. Despite the legislative changes, countersignature of pharmacist  
15 orders was a local requirement owing to the concern that junior doctors may become deskilled as a  
16 result of being removed from the prescribing process. However, the authors suggest that having an  
17 appropriately trained prescribing pharmacist in clinic, for the RMOs to use as guidance and to  
18 feedback on any prescribing errors, may increase the effectiveness of the learning environment.  
19  
20  
21  
22  
23  
24  
25  
26  
27

28 Only having one pharmacist prescribing in the intervention arm, and multiple RMOs prescribing in the  
29 control arm is a potential source of bias, unavoidable where individual knowledge, skills and  
30 capabilities determine the quality of prescribing. It has been suggested medical undergraduate  
31 training may not prepare graduates to prescribe, which if addressed, may reduce this individual  
32 variance.[32] The model of care tested in our study was successful as we were able to reduce the  
33 variance within a group by training one individual pharmacist to manage medications perioperatively,  
34 within a set scope of practice, and to include prescribing. It could be argued that the same results may  
35 have been obtained by providing the RMOs with extra prescribing training, and the improved  
36 performance may not necessarily be solely down to the introduction of a new professional discipline.  
37 The authors acknowledge the improved results may well be multi-factorial, but would also suggest  
38 that the underlying competencies of an experienced, 'advanced level' pharmacist, plus the prescribing  
39 training provided, have ensured appropriate competencies to prescribe in the model of care in which  
40 the prescribing took place.[33]  
41  
42  
43  
44  
45  
46  
47  
48  
49  
50  
51

52 The order of consultation in the intervention arm was set by trial design. The order in the control arm  
53 was not set, which is a true reflection of usual care, where the patient could see the RMO prior to the  
54 pharmacist. This may have impacted on quality of control medication charts prescribed by the RMO,  
55 without information available from the pharmacist history. Whilst this could be classed as a limitation,  
56  
57  
58  
59  
60

1  
2  
3 this does reflect usual care in PAC and highlights the collaborative nature of the existing model of  
4 care.  
5

6  
7 The prescribing pharmacist was able to see control patients for usual care duties of a medication  
8 history, which may be perceived as introducing bias. However, as both pharmacists have received the  
9 same undergraduate and general level pharmacist training, the quality of medication history gathered  
10 for the RMO to use to prescribe the medication chart would be the same.  
11

12  
13  
14 Another limitation is the potential sustainability of the model of care, and capacity to train pharmacists  
15 as prescribers. This was only one pharmacist, in one hospital who had received special training to be  
16 able to prescribe. Evaluation of the requirements of non-medical prescribing courses is underway, but  
17 substantial further thought needs to be applied to ensure reproducibility of these results, in a larger  
18 sample, and consistent production of safe and effective prescribers.[34]  
19

20  
21  
22 Further work is required to address the actual and perceived medico-legal implications for both  
23 doctors and pharmacists in such collaborations.  
24

## 25 26 27 28 29 **CONCLUSION**

30  
31 Medication charts in the intervention arm were significantly safer and more accurate with regards to  
32 the patients' regular medications, than medication charts in the control arm.  
33

34  
35 There was no difference in appropriateness of VTE prophylaxis prescribing between arms on  
36 admission to the ward.  
37

38  
39 Our study has shown the pharmacist in PAC was able to effectively gather all the information required  
40 to collaboratively formulate a clinical decision in clinic within an agreed scope of practice, and  
41 communicate the decisions safely and accurately onto the medication chart.  
42

43  
44  
45 A collaborative doctor – pharmacist prescribing model in a PAC was as safe and accurate as usual  
46 care, in ensuring that patients were prescribed the medication required on admission for elective  
47 surgery.  
48

## 49 50 51 **Acknowledgements**

52  
53 The authors would like to acknowledge the following people, without whom the study would not have  
54 been possible.  
55

56 Professor Stephen Lynch, Chair of Surgery, Princess Alexandra Hospital

57 A/Prof Lynette Loy, Director of Pharmacy, Princess Alexandra Hospital  
58  
59  
60

1  
2  
3 Ms Ching-Ting Hung, Senior Pharmacist, Princess Alexandra Hospital

4 Ms Renea Collins, Clinical Nurse Consultant, VTE Prophylaxis, Princess Alexandra Hospital

5  
6 All of the staff in Pre Admission Clinic

7  
8 **Competing Interests**

9  
10 There are no competing interests to be declared for any of the authors

11  
12 **Funding**

13  
14 There was no external funding received for the study.

15  
16  
17 **Copyright**

18  
19 The Corresponding Author has the right to grant on behalf of all authors and does grant on behalf of  
20 all authors, an exclusive licence (or non-exclusive for government employees) on a worldwide basis to  
21 the BMJ Group and co-owners or contracting owning societies (where published by the BMJ Group  
22 on their behalf), and its Licensees to permit this article (if accepted) to be published in BMJ Quality  
23 and Safety and any other BMJ Group products and to exploit all subsidiary rights, as set out in our  
24 licence.  
25  
26  
27  
28  
29

30  
31 **Contributorship**

32  
33 Contributorship and guarantorship are concepts that were applied first to original research papers,  
34 and are sometimes hard to define for other articles. Each contributorship statement should make  
35 clear who has contributed what to the planning, conduct, and reporting of the work described in the  
36 article, and should identify one, or occasionally more, contributor(s) as being responsible for the  
37 overall content as guarantor(s)  
38  
39

40  
41 Andrew Hale, Ian Coombes, Julies Stokes, Karen Whitfield, Elizabeth Maycock and Lisa Nissen  
42 contributed to project concept and study design. Andrew Hale collected all data and was responsible  
43 for the running of the study.  
44  
45

46  
47 Andrew Hale, Ian Coombes, Julie Stokes, Lisa Nissen were evaluation of data. Andrew Hale and David  
48 Mcdougall were responsible for database design, data evaluation and statistical reporting.  
49

50  
51 All authors contributed significantly to write up of the project. All authors have read and approved  
52 the final manuscript.  
53  
54  
55  
56  
57  
58  
59  
60

### Data sharing

"Extra data can be accessed via the Dryad data repository at <http://datadryad.org/> with the doi:10.5061/dryad.81tr1."

### REFERENCES

1. Coombes I, Reid C, McDougall D, et al. Pilot of a National Inpatient Medication Chart in Australia: improving prescribing safety and enabling prescribing training. *Br J Clin Pharmacol* 2011;72(2):338-349
2. Bates D, Cullen D, Laird N, et al. Incidence of Adverse Drug Events and Potential Adverse Drug Events: Implications for Prevention. *JAMA* 1995; 274(1):29-34.
3. Bobb A, Gleason K, Husch M, et al. The epidemiology of prescribing errors: the potential impact of computerized prescriber order entry. *Arch Intern Med* 2004;164:785-792.
4. Cornish P, Knowles S, Marchesano R, et al. Unintended Medication Discrepancies at the Time of Hospital Admission. *Arch Intern Med* 2005;165(4):424-429.
5. Bates D, Boyle D, Vander Villet M, et al. Relationship between Medication Errors and Adverse Drug Events. *J Gen Intern Med* 1995;10:199-205.
6. Dean B, Barber N, Schacter M. What is a prescribing error? *Quality in Health Care* 2000; 9: 232-237.
7. Aronson JK. Balanced prescribing. *Br J Clin Pharmacol* 2006;62:629-32.
8. Barber N, Rawlins M, Dean Franklin B. Reducing prescribing error: competence, control, and culture. *Qual Saf Health Care* 2003;12:i29-32.
9. Stowasser D. Medication Information and health outcomes - Development and evaluation of a medication liaison service, in School of Pharmacy 2000, University of Queensland: Brisbane.



- 1  
2  
3  
4  
5  
6  
7  
8  
9  
10  
11  
12  
13  
14  
15  
16  
17  
18  
19  
20  
21  
22  
23  
24  
25  
26  
27  
28  
29  
30  
31  
32  
33  
34  
35  
36  
37  
38  
39  
40  
41  
42  
43  
44  
45  
46  
47  
48  
49  
50  
51  
52  
53  
54  
55  
56  
57  
58  
59  
60
10. Nagpal K, Arora S, Vats A, *et al.* Failures in communication and information transfer across the surgical care pathway: interview study. *BMJ Qual Saf* 2012;21:843-849
  11. Bhanji, A, Fallon K, LeBlanc S. Pharmacy Involvement in a Surgery Preadmission Program. *Am J Health Syst Pharm* 1993;50:483-486.
  12. Wright P, Khachi H, Vercaeren S, *et al.* Medicines reconciliation in preadmission clinics can improve medicines prescribing. *Pharmacy in Practice* 2008.18(2):p44-46.
  13. Crown J. Review of prescribing, supply and administration of medicines. Final report. 1999: London.
  14. Courtenay M, Carey N. Nurse independent prescribing and nurse supplementary prescribing practice: National survey. *J Adv Nurs* 2008;61(3):291-299.
  15. Australian Institute of Health and Welfare. Medical labour force 2005. Canberra: AIHW 2008 (AIHW Cat. no. HWL 41, Series number 40)
  16. National Health Workforce Taskforce. *Health Workforce in Australia and Factors for Current Shortages* 2009  
<http://www.nhwt.gov.au/documents/NHWT/The%20health%20workforce%20in%20Australia%20and%20factors%20influencing%20current%20shortages.pdf> (accessed Jan 2012)
  17. Brooks P, Lapsley H, Butt D. *Medical workforce issues in Australia: 'tomorrow's doctors - too few, too far'*. *Med J Aust* 2003(179): 206-8.
  18. Health Workforce Australia, *HWA Work Plan 2011/12*. Approved by Australian Health Ministers' Conference, 26 September 2011
  19. National Health Workforce Research and Planning Collaboration, *Non-Medical Prescribing. An exploration of likely nature of, and contingencies for, developing a nationally consistent approach to prescribing by non-medical health professionals*. Final Report. 1 June 2010.
  20. Bessell T, Marriott J, Emmerton L, *et al.* Improving Australians' Access to Prescription Medicines: Development of Pharmacy Practice Models. Final Report. 2005.

- 1  
2  
3 21. Bhanbhro S, Drennan V, Grant R, et al. Assessing the contribution of prescribing in primary  
4 care by nurses and professionals allied to medicine: a systematic review of the literature.  
5  
6 *BMC Health Serv Res* 2011;11:330  
7  
8  
9 22. Van Der Weyden, M. Doctor displacement: a political agenda or a health care imperative?  
10  
11 *Med J Aust* 2008;189(11/12):608-609.  
12  
13  
14 23. National Health Performance Committee, National Health Performance Framework Report, Q.  
15 Health, Editor. 2001: Brisbane.  
16  
17  
18 24. Hale A, Nissen L. Does the Consultation Order in a Multidisciplinary Elective Surgical Pre-  
19 Admission Clinic Influence the Frequency and Quality of Prescribing for Inpatient Medication  
20 Charts? Australasian Pharmaceutical Science Association, Brisbane 6<sup>th</sup> – 9<sup>th</sup> Dec 2010  
21  
22  
23  
24  
25 25. General Pharmaceutical Council, Accreditation of Independent Prescribing Programmes.  
26 2010, General Pharmaceutical Council.  
27  
28  
29  
30 26. Australia and New Zealand Working Party on the Management and Prevention of Venous  
31 Thromboembolism: *Prevention of venous thromboembolism best practice guidelines for*  
32 *Australia and New Zealand*. 4th edition. Sydney, Health Education and Management  
33 Innovations; 2007  
34  
35  
36  
37  
38  
39 27. Marotti S, Kerridge R, Grimer M. A randomised controlled trial of pharmacist medication  
40 histories and supplementary prescribing on medication errors on postoperative medications.  
41  
42 *Journal of Anaesthesia and Intensive Care* 2011; 29(6):1064-1070  
43  
44  
45  
46 28. Reid F, Murray P, Storrie M. Implementation of a Pharmacist Led Clinic for Hypertensive  
47 Patients in Primary Care – A Pilot Study. *Pharmacy World and Science* 2005; 27(3):202-207  
48  
49  
50  
51  
52 29. Burns, N. Evaluation of warfarin dosing by pharmacists for elderly medical in-patients. *Pharm*  
53 *World Sci* 2004;26(4):232-237  
54  
55  
56  
57  
58  
59  
60

- 1  
2  
3  
4  
5  
6  
7  
8  
9  
10  
11  
12  
13  
14  
15  
16  
17  
18  
19  
20  
21  
22  
23  
24  
25  
26  
27  
28  
29  
30
30. Australian Commission on Safety and Quality in Healthcare. National terminology, abbreviations and symbols to be used in the prescribing and administering of medicines in Australian hospitals. October 2006
  31. Koppel R, Metlay J, Cohen A. Role of Computerized Physician Order Entry Systems in Facilitating Medication Errors. *JAMA* 2005; 292(10):1197-1203
  32. Pillans P. How prepared are medical graduates to begin prescribing? *Intern Med J* 2009; 39: 425-7.
  33. Morris S, Coombes I. The right to prescribe: towards core prescribing competencies for all prescribers. *Australian Prescriber* 2011;34(5):126
  34. Coombes I, Wheeler A, Hale A. Evaluation of effectiveness and relevance of Safe Medication Practice Tutorials as a course for pharmacist prescribers in New Zealand. *Pharmacy Education* 2011;11(1):95-98

31 Figure legends:

32 Figure 1 - Randomisation Flowchart

33 Figure 2 - Percentage of Medications Omitted

34 Figure 3 - Assessment of Clinical Significance of Omissions

35 Figure 4 - Numbers of Prescribing Errors

36 Figure 5 - VTE Prophylaxis Assessments and Prescribing

37  
38  
39  
40  
41  
42  
43  
44  
45  
46  
47  
48  
49  
50  
51  
52  
53  
54  
55  
56  
57  
58  
59  
60

**Perioperative Medication Management—Expanding the Role of the Pre Admission Clinic  
Pharmacist in a Single-Centre, Randomised Controlled Trial of Collaborative Prescribing**

Corresponding Author:

Mr A R Hale

Senior Pharmacist, Pre Admission Clinic  
Princess Alexandra Hospital  
Brisbane, 4102,  
Qld, Australia  
Phone 00617 31767848  
Fax 00617 31767122  
E-mail address:  
andrew\_hale@health.qld.gov.au

Contact Address:  
87 Norfolk Street,  
Coorparoo,  
Brisbane, 4151

**A/Prof~~Dr~~** I D Coombes, PhD  
Director,  
Pharmacy Department, Royal Brisbane and Womens Hospital,  
Brisbane, 4029  
Qld, Australia

Dr J Stokes, PhD  
Consultant Pharmacist,  
Medicines Regulation and Quality, Queensland Health,  
Locked Bag 21, Fortitude Valley,  
Brisbane, 4006  
Qld, Australia

Mr D McDougall  
Senior Pharmacist,  
Princess Alexandra Hospital,  
Brisbane, 4102,  
Qld, Australia

Dr K Whitfield, PhD  
Senior Lecturer,  
School of Pharmacy, Pharmacy Australia Centre of Excellence, The University of Queensland,  
Brisbane, 4102  
Qld, Australia

Dr E Maycock  
Consultant Anaesthetist,  
Princess Alexandra Hospital,  
Brisbane, 4102,  
Qld, Australia

**Prof~~Dr~~** L Nissen, PhD  
Professor (Head), School of Clinical Sciences  
Queensland University of Technology (QUT)  
Brisbane, 4000  
Qld, Australia

1  
2  
3  
4  
5  
6  
7  
8  
9  
10  
11  
12  
13  
14  
15  
16  
17  
18  
19  
20  
21  
22  
23  
24  
25  
26  
27  
28  
29  
30  
31  
32  
33  
34  
35  
36  
37  
38  
39  
40  
41  
42  
43  
44  
45  
46  
47  
48  
49  
50  
51  
52  
53  
54  
55  
56  
57  
58  
59  
60

Keywords: Allied health, Pharmacy, Non-medical prescribing, Pharmacist prescribing, Safe prescribing

Word Count :

Abstract 271

Main text 3182

## Article Summary

### Article Focus

- A doctor-pharmacist collaborative prescribing model provides as least as high a quality of care as usual care, with regards to safety, access, appropriateness, effectiveness, efficiency and consumer participation
- Workforce shortages are prompting a review of the way that the current workforce is utilised, and whether different roles could be taken on by healthcare professionals to alleviate some of the pressures within the system.
- Research on non medical prescribing so far is predominantly qualitative in nature. Our study has analysed quantitative data on safety, accuracy and appropriateness of prescribing to try and assess whether this model is at least as good as usual care.

### Key Messages

- Pharmacists' skills in medication management are currently underutilised, and with appropriate training and education they could be contributing to medication management much more effectively by taking on a prescribing role.
- The prescribing is collaborative, and driven by guidelines and under the supervision of a medical team. Diagnosis is not within the scope of practice of the prescribing pharmacist.
- This model of care has been proved to be highly effective in this study, with an increased accuracy, safety and appropriateness of prescribing within the intervention arm

### Strengths and Limitations

- The results, with regards to accuracy and safety of medication charts produced in the study are emphatic and statistically significant.
- The intervention is reproducible in other setting with a pharmacist of appropriate experience, training and education.

1  
2  
3  
4  
5  
6  
7  
8  
9  
10  
11  
12  
13  
14  
15  
16  
17  
18  
19  
20  
21  
22  
23  
24  
25  
26  
27  
28  
29  
30  
31  
32  
33  
34  
35  
36  
37  
38  
39  
40  
41  
42  
43  
44  
45  
46  
47  
48  
49  
50  
51  
52  
53  
54  
55  
56  
57  
58  
59  
60

- The study assessed one pharmacist prescriber versus a cohort of medical prescribers. While this has been accounted for in the analysis, this reflects what usual practice would be in a model care such as this. The authors recognise and acknowledge it as a limitation.

For peer review only

1  
2  
3  
4  
5  
6  
7  
8  
9  
10  
11  
12  
13  
14  
15  
16  
17  
18  
19  
20  
21  
22  
23  
24  
25  
26  
27  
28  
29  
30  
31  
32  
33  
34  
35  
36  
37  
38  
39  
40  
41  
42  
43  
44  
45  
46  
47  
48  
49  
50  
51  
52  
53  
54  
55  
56  
57  
58  
59  
60

**Perioperative Medication Management—Expanding the Role of the Pre Admission Clinic Pharmacist [in a Single Centre, Randomised Controlled Trial of Collaborative Prescribing](#)**

**ABSTRACT**

**Objectives:** Current evidence to support non-medical prescribing is predominantly qualitative, with little evaluation of accuracy, safety and appropriateness. Our aim was to evaluate a new model of service for the Australia healthcare system, of inpatient medication prescribing by a pharmacist in an elective surgery pre admission clinic (PAC) against usual care, using an endorsed performance framework.

**Design:** **Single centre**, randomised controlled, two arm trial

**Setting:** Elective surgery pre admission clinic in Brisbane based tertiary hospital

**Participants:** Four hundred adults scheduled for elective surgery were randomised to intervention or control.

**Intervention:** A pharmacist generated the inpatient medication chart to reflect the patient's regular medication, made a plan for medication perioperatively and prescribed VTE prophylaxis.

In the control arm, the medication chart was generated by the Resident Medical Officers (RMO).

**Outcome Measures:** Primary outcome was frequency of omissions and prescribing errors when compared against the medication history. The clinical significance of omissions was also analysed.

Secondary outcome was appropriateness of VTE prophylaxis prescribing.

**Results:** There were significantly less unintended omissions of medications: 11 of 887 (1.2%) intervention orders compared with 383 of 1217 (31.5%) control ( $p<0.001$ ).

There were significantly less prescribing errors involving selection of drug, dose or frequency: 2 in 857 (0.2%) intervention orders compared with 51 in 807 (6.3%) control ( $p<0.001$ ).

Orders with at least one component of the prescription missing, incorrect or unclear occurred in [20826](#) of 904 ([235%](#)) intervention orders and [445667](#) of 1034 ([4364.5%](#)) control ( $p<0.001$ ).

1  
2  
3  
4  
5  
6  
7 VTE prophylaxis on admission to the ward was appropriate in 93% of intervention patients and 90%  
8 control (p=0.29).  
9

10 **Conclusion:** Medication charts in the intervention arm contained fewer clinically significant omissions,  
11 and prescribing errors, when compared to control.  
12

13  
14 There was no difference in appropriateness of VTE prophylaxis on admission between the two  
15 groups.  
16

17  
18 **Trial Registration:** Registered with ANZCTR – ACTR Number ACTRN12609000426280  
19  
20  
21  
22  
23  
24  
25  
26  
27  
28  
29  
30  
31  
32  
33  
34  
35  
36  
37  
38  
39  
40  
41  
42  
43  
44  
45  
46  
47  
48  
49  
50  
51  
52  
53  
54  
55  
56  
57  
58  
59  
60



## INTRODUCTION

Prescribing involves four stages; information gathering, clinical decision making, communication of decision and monitoring.[1] Taking a medication history, continuing, ceasing and withholding of medications, and initiating new medications are critical components of prescribing associated with an admission for surgery. Medication errors are common, occur most often at the time of prescribing, and frequently on the day of hospital admission, resulting in discrepancies between regular medications and admission orders.[2-4] A small, but significant, proportion of errors result in adverse drug events (ADEs).[5] Errors have been defined as when there is "a failure to communicate essential information; the use of drugs or doses is inappropriate for the individual patient; and transcription error." [6] To be able to communicate a clinical decision safely and effectively in the form of a written prescription, it is necessary for selection of the correct drug, together with the route, form, dose, frequency and duration.[7] Multiple interventions have been suggested in an attempt to improve prescribing, with suggestions that increased training of the individual, a controlled environment and a change in organisational culture are necessary.[8]

Within hospital, the medication chart provides instructions for safe medication supply and administration, and ensures patient access to medications as an inpatient. It is an integral part of communication between doctors, pharmacists and nurses about prescribing decision and is used as the primary source of information regarding medications on discharge. The pharmacy service in Princess Alexandra Hospital (PAH) PAC began in 1998, to provide timely, accurate and comprehensive information about medication as patients crossed between healthcare settings. It ensured accurate transfer of information at admission, during the inpatient stay and at discharge, the benefits of which were a reduction in both readmissions and contact with community healthcare providers post discharge.[9] The importance of accurate transfer of information across the whole surgical care pathway from preadmission to discharge, including information about medications, has been highlighted in a recent study that reported communication failures led to patient morbidity and mortality. Standardisation and systemisation of communication processes, along with other interventions targeted at the entire surgical pathway were recommended, with a view to improving information transfer and quality of care.[10]

Pharmacists in pre admission clinics (PAC) have been shown to improve the accuracy of medication histories and medication orders, when compared to standard care, and the efficacy of prescribing

1  
2  
3  
4  
5  
6  
7 perioperatively in line with recognised guidelines.[11,12] Only with an accurate history of medication  
8 usage can decisions be made safely regarding management of medications perioperatively.

9  
10 Medication histories are elicited from a variety of sources of information; patient's own medications,  
11 the patient or carer, GP summaries, community pharmacies, previous hospital admissions and  
12 nursing home records. A number of sources may be consulted to build an accurate record of  
13 medication that the patient is taking, both regularly and occasionally.

14  
15  
16  
17 The range of prescribers has been expanded in a number of countries, with changes in legislation to  
18 allow for extension of prescribing privileges to non-medical professionals, including pharmacists. ~~The~~  
19 objective of ~~this~~ which was to make greater use of the skills and specialisation of pharmacists so that a  
20 more flexible system for the prescribing, supply and administration of medicines could be developed,  
21 whilst maintaining safe and appropriate access to medicines ~~improve access to medicines in the light~~  
22 ~~of healthcare workforce shortages.~~[13,14]

23  
24  
25  
26 In response to ~~similar~~ documented workforce shortages in Australia, Brooks *et al* described possible  
27 solutions, including 'task substitution', and a focus has been placed recently on non-medical  
28 prescribers within the healthcare system.[15-19] Pharmacists, with training in pharmacology and  
29 therapeutics, are potentially well placed to undertake prescribing roles. An Australian study identified  
30 the main driver behind pharmacist prescribing as the desire to work collaboratively with medical and  
31 nursing staff to:

- 32  
33  
34  
35  
36  
37  
38  
39  
40  
41  
42  
43  
44  
45  
46  
47  
48  
49  
50  
51  
52  
53  
54  
55  
56  
57  
58  
59  
60
- provide consumers with improved, responsible and safe access to prescription medicines
  - optimise use of pharmacists' and doctors' skills and time
  - reduce inefficient use of health resources.[20]

Evidence to support non-medical prescribing so far has been mainly qualitative, with minimal  
evaluation of access, safety and appropriateness. One recent review concluded acceptability of non-  
medical prescribing services is based on the perceived value to the health service.[21] This lack of  
evidence has led to calls to prove the safety and effectiveness of non-medical prescribing services in  
Australia.[22] The aim of the data analysis discussed in this paper was to compare a doctor –  
pharmacist collaborative prescribing model with usual care, with regards to safety, access,  
appropriateness and effectiveness; the null hypothesis being that no difference exists between the  
two models of care.[23]

## METHODS

The study was conducted between June to September 2009 in the surgical PAC at PAH, a 750 bed tertiary teaching hospital in Queensland.

Ethics approval was obtained from the PAH Human Research Ethics Committee.

The definition of error used in the study was:

*“a failure to communicate essential information; the use of drugs or doses is inappropriate for the individual patient; and transcription error.”*[3]

All patients who attended PAC and could provide written, informed consent were considered for participation. Patients were excluded if they were under 18 years of age, unable to communicate due to language difficulties or undergoing day surgery (see Figure 1)

Patients were approached on arrival at clinic and written consent was obtained. After consent, patients were randomised using a computer generated randomisation list, in blocks of ten (Microsoft Excel). Sealed envelopes (not prepared by the recruiting researcher) contained a zero or one as per the computer list; the next envelope was opened after consent to determine whether a patient entered the control or intervention arm respectively. If a patient had been randomised, and surgery cancelled during PAC, the patient was removed from the study and not replaced.

A previous pilot study in PAC showed an error rate of 12% of orders.[24] Using an expected error rate of 8% in the intervention arm a sample size of 932 orders per group was calculated to be required for a power of 80%. Assuming an average of 5 orders per patient, approximately 200 patients per arm would be required.

Only one pharmacist in PAC, with three years' experience as a hospital pharmacist and having a postgraduate diploma in clinical pharmacy, was trained to be a prescriber. The pharmacist attended a prescribing course which was accredited by the General Pharmaceutical Council, UK as an Independent Pharmacist Prescribing Course.[25]

Training included a minimum of 12 days of 'period of learning in practice' under a 'designated medical practitioner' (DMP), who was the consultant anaesthetist for PAC. The training included case studies and sessions on venous thromboembolism (VTE) prophylaxis with a consultant vascular physician

1  
2  
3  
4  
5  
6  
7 and the clinical nurse consultant (CNC) for VTE prophylaxis at PAH. The DMP endorsed the  
8 pharmacist's competency to prescribe before the study could commence.  
9

10 For the pilot, an amendment was facilitated to the *Queensland Health (Drugs and Poisons)*  
11 *Regulation 1996* to allow 'Pharmacists registered in Queensland who are employed or contracted to  
12 Queensland Health and working in the Pharmacist Prescribing Pilot' to prescribe controlled drugs,  
13 restricted drugs and Schedule 2 and 3 poisons.  
14  
15

### 16 **Intervention Cohort**

17  
18 Patients were seen by a nurse, prescribing pharmacist, Resident Medical Officer (RMO) and  
19 anaesthetist. Patients had to be seen by the pharmacist before they were seen by the RMO to allow  
20 usual RMO duties and a countersignature of the pharmacist prescriptions, a site requirement.  
21  
22

23  
24 The pharmacist undertook all pharmacist duties as per usual care, as well as prescribing medications  
25 on the medication chart. The scope of prescribing was continuing or withholding regular medications  
26 and prescribing VTE prophylaxis according to local and national guidelines, following a risk and  
27 contraindication assessment.[26]  
28  
29

30  
31 Directors of surgery were consulted prior to commencement of the trial for permission to include  
32 patients in prescribing of VTE prophylaxis, according to their specific unit guidelines, which had been  
33 defined in advance in collaboration with the CNC for VTE prophylaxis at PAH. Urology and renal  
34 transplant patients were excluded (N=43 control, N=34 intervention) from VTE prophylaxis prescribing  
35 as the director of urology was unavailable to confirm the scope of the project, and the director for  
36 transplant requested exclusion on the grounds that VTE prophylaxis in these patients being more  
37 consultant discretion as opposed to guideline driven.  
38  
39  
40  
41

### 42 **Control Cohort**

43  
44 Patients were seen by all four health care professionals in clinic, in no particular order, as per usual  
45 care. Either pharmacist in the clinic saw control patients for documentation of medication history. The  
46 prescribing of the medication chart was the responsibility of the RMO. In both arms, review and  
47 monitoring was undertaken, both by the RMOs in clinic at countersignature and by RMOs and clinical  
48 pharmacists at a ward level once the patient was admitted. Changes made by RMOs to intervention  
49 patient medication charts in clinic were recorded.  
50  
51  
52  
53  
54  
55  
56  
57  
58  
59  
60

## Outcome Measures

The primary endpoint for the study was the accuracy of medication charts, with regards to concordance of the medication chart with the medication history, the plan for medications perioperatively and the quality of the individual orders related to legality and safety for administration purposes. The secondary endpoint was the appropriateness of prescribing for both chemical and mechanical VTE prophylaxis according to local and national guidelines.[26]

~~Appropriateness of VTE prophylaxis prescribed in both arms in clinic was reassessed on admission to ensure prescribing was still appropriate.~~

~~Analysis of scanned copies of medication charts, for the primary outcomes of omissions and errors~~Audits were, was conducted in tandem by two assessors: one member of the research team and one external assessor, both trained in use of the validated audit tools<sup>1</sup> and blinded to randomisation. Any ambiguities were clarified by consensus.

~~Appropriateness of VTE prophylaxis prescribed in both arms in clinic was analysed, using scanned copies of medication charts, in tandem by two assessors: one member of the research team and the Clinical Nurse Consultant (CNC) for VTE prophylaxis at PAH. Prescribing was also assessed on admission to the ward to ensure VTE prophylaxis was appropriate.~~

An expert panel, comprising of a surgeon, clinical pharmacologist, anaesthetist, RMO, pharmacist and a nurse, was convened to assess the ~~appropriateness of prescribing and~~ clinical significance of omissions in a randomly selected 5% sample of the total cohort of patients from both arms (N=10 control, N=9 intervention). ~~Panel members were blinded to randomisation.~~

Tables 1 and 2 describe the collection methods and definitions of these endpoints.

Table 1 – Analysis to assess accuracy and safety of medication charts generated in the study

| Measure              | Definition                                                                                                                            | Method                                                                                                                    | Assessing                                                                                          |
|----------------------|---------------------------------------------------------------------------------------------------------------------------------------|---------------------------------------------------------------------------------------------------------------------------|----------------------------------------------------------------------------------------------------|
| Omissions            | Medication in patient's medication history not prescribed on medication chart, with no reason documented in patient chart             | Every medication in patient's medication history checked against medication chart - omissions from medication chart noted | Whether or not medication is prescribed                                                            |
| Prescribing Errors   | Anomaly in drug name, strength, dose, frequency or route, with no documentation in patient chart                                      | Every medication in patient's medication history checked against medication chart – anomalies noted                       | Whether or not prescription is accurate in terms of drug name, strength, dose, frequency and route |
| Communication Errors | Unclear prescription in terms of name, route, dose, frequency, slow release medication notification or intermittent order prescribing | Every prescription written checked using validated tool – unclear prescribing noted, as agreed by both researchers        | Whether or not prescription is safe for administration purposes                                    |

**Table 2 – Analysis to assess accuracy of VTE risk and contraindication assessments and appropriateness of VTE prescribing**

| Measure                         | Definition                                                                                     | Method                                                                                                      | Assessing                                                                              |
|---------------------------------|------------------------------------------------------------------------------------------------|-------------------------------------------------------------------------------------------------------------|----------------------------------------------------------------------------------------|
| VTE Risk Assessment             | Patient categorised in to low or high risk for VTE, as per guidelines                          | Every patient medical record checked for a documented VTE risk assessment                                   | Risk assessment documented Y/N<br>Risk assessment correct Y/N                          |
| VTE Contraindication Assessment | Patient highlighted as inappropriate for mechanical or chemical prophylaxis, as per guidelines | Every patient medical record checked for a documented contraindication assessment                           | Contraindication assessment documented Y/N<br>Contraindication assessment correct Y/N  |
| VTE prescribing                 | Whether patient prescribed mechanical and/or chemical VTE prophylaxis, as per guidelines       | Prescribing of mechanical and chemical VTE prophylaxis checked against agreed local and national guidelines | VTE prescribing appropriate according to guidelines and individual patient factors Y/N |

Continuous variables were compared using Wilcoxon rank-sum tests due to the non-parametric nature of the data. Categorical data was compared using chi-square tests for independence. When any one cell had a count of less than ten or Fisher's exact tests where appropriate was substituted. All reported p-values are two-sided using a level of significance of 0.05. Logistic regression was used to analyse the overall omissions between the two groups. The number of regular and 'pm' medications the patient was currently taking was included as an explanatory variable in the model as it was deemed more likely an individual medication would be omitted in a patient taking a large number of medications. Logistic regression was also used to analyse the overall communications prescribing errors between the two groups. The assumption of independence between observations is clearly violated as multiple observations exist for most subjects. As such, robust standard errors clustered by patient were calculated. Odds ratios for patient to have one or greater omissions were calculated using the Mantel – Haenszel method of stratification. Patients were stratified according to

the total number of medications on their complete medication history as it was deemed more likely that an omission would occur in a patient taking a larger number of medications. No other covariates were adjusted for. All reported p values are two-sided using a level of significance of 0.05. All statistical analysis and sample size calculations was conducted using Stata 11.2 (StataCorp, College Station, Tx).

## RESULTS

**Table 3 Characteristics of Study Population**

The demographics of the patients randomised in to the trial were similar, except for the higher number of medications taken by patients in the control arm (See Table 3)

|                                                 | Control      | Intervention |
|-------------------------------------------------|--------------|--------------|
| Total Patients                                  | 190          | 194          |
| Age ‡                                           | 57.6 [18-89] | 55.8 [18-86] |
| Male (%)                                        | 58%          | 59%          |
| *Regular Medications†                           | 4[0-16]      | 3[0-18]      |
| #When Required 'PRN' Medications†               | 2[0-7]       | 1[0-4]       |
| Complementary and Alternative Medicines (CAM) † | (0)[0-9]     | (0)[0-6]     |
| Over The Counter (OTC) Medications†             | (0)[0-2]     | (0)[0-2]     |
| Total Medications                               | 1364         | 983          |
| Total medications (regular and prn only)        | 1217         | 887          |
| Medication Charts Prescribed                    | 161 (85%)    | 194 (100%)   |

‡ mean [range]

† median [range]

\*Regular medications are defined as medications prescribed with the intent to be taken on a regular basis

#Pro Re Nata (PRN) medications are defined as medications prescribed with the intent to be taken only when required



### Omissions

Total unintentional medication omissions from medication charts was significantly higher for control patients (31.5%) compared to intervention (1.2%) ( $p < 0.001$ , chi-square). The odds ratio for an order in the control group to be omitted, compared to the intervention group was 41.0 (95% CI 20.6 – 81.8) ( $p < 0.001$  logistic regression) after adjusting for the number of medications the patient was currently taking. (see Table 4 and Figure 2) There were 59 prescribers in the control arm, 54 of whom reviewed patients who were currently taking regular or PRN medications at home, and as such had the opportunity to omit a patient's medication. Out of these 54 prescribers, the median percentage of medications that were omitted per prescriber in the control arm was 21 (range 0 - 100).

Table 4: Medication omissions from medication chart

| Type of Medication and Perioperative Plan              | Control (N)[%]  | Intervention(N)[%] |
|--------------------------------------------------------|-----------------|--------------------|
| <b>Regular</b>                                         |                 |                    |
| Continue                                               | 179 (805)[22.2] | 3 (620)[0.5]       |
| Withhold prior to surgery                              | 46(75)[7.4]     | 0(48)              |
| Withhold on morning of surgery                         | 21(54)[38.9]    | 0(39)              |
| Adjust dose                                            | 1(5)[20.0]      | 0(5)               |
| Review                                                 | 1(7)[14.2]      | 0(6)               |
| Cease                                                  | 0(1)            | 0(2)               |
| <b>PRN</b>                                             |                 |                    |
| Continue                                               | 128(248)[51.6]  | 6(142)[4.2]        |
| Withhold prior to surgery                              | 7(12)[58.3]     | 2(13)[15.4]        |
| Adjust dose                                            | 0(2)[20.0]      | 0(1)               |
| Review                                                 | 0(8)[14.3]      | 0(11)              |
| <b>Total Omissions</b>                                 | 383(1217)[31.5] | 11(887)[1.2]       |
| <b>*Complementary and Alternative Medicines (CAMs)</b> | 126             | 87                 |
| <b>*Over The Counter Medications (OTC)</b>             | 21              | 9                  |

\*CAM and OTC medications were not classed as omissions in either arm if not prescribed on the inpatient medication chart

1  
2  
3  
4  
5  
6  
7  
8  
9  
10  
11  
12  
13  
14  
15  
16  
17  
18  
19  
20  
21  
22  
23  
24  
25  
26  
27  
28  
29  
30  
31  
32  
33  
34  
35  
36  
37  
38  
39  
40  
41  
42  
43  
44  
45  
46  
47  
48  
49  
50  
51  
52  
53  
54  
55  
56  
57  
58  
59  
60

The crude odds ratio for a patient in the control arm to have one or greater omissions was 37.5 (95% CI 16.9—93.1,  $p<0.001$ ). After randomisation control patients had a larger number of medications on their history compared to the intervention patients and therefore the crude odds ratio could be misleading. Stratifying the patients into 4 groups, based on total number of medications in the complete history and utilising the Mantel-Haenszel method to control for potential confounding, the adjusted odds ratio for a patient in the control arm to have one or greater omissions was 31.7 (95% CI 14.7—68.3,  $p<0.001$ ).

### Clinical Significance of Omissions

Omissions from a randomly selected 5% of the total cohort were evaluated for clinical significance.

Out of 89 regular medication in the patients' medication histories in the control arm, 25 (28%) were omitted from the medication charts, compared to 1 out of 55 (2%) in the control arm ( $p<0.001$ , exact).

When asked to assess the severity of omission, the average across the panel showed 52% of omissions in the control arm had the potential for patient harm or ward inconvenience (see Figure 3)

Only one reviewer thought the omission in the intervention arm was significant.

### Prescribing Errors Related to Drug, Dose and Frequency Selection

Overall, 53 errors were identified where the drug strength, dose or frequency prescribed did not match the medication history or perioperative plan (see Figure 4). This equates to 4.9% of control orders compared to 0.2% of intervention orders ( $p<0.001$ , Fisher's exact).

### Communication Errors

Communication errors, where prescriptions were rated as ambiguous or unclear, were significantly higher in the control arm compared to the intervention arm. The odds ratio for an order in the control arm to have a communication error compared to an order in the intervention arm was 2.52 (95%CI 1.96 – 3.27) (logistic regression  $p<0.001$ ). As there were multiple orders per patient, robust standard errors, clustered by patient were utilised ( $p<0.001$ , chi-square) (see Table 5). Individually, communication errors were significantly higher in the control arm for all types of error except route of administration ( $p=0.57$  chi-square).

1  
2  
3  
4  
5  
6  
7  
8  
9  
10  
11  
12  
13  
14  
15  
16  
17  
18  
19  
20  
21  
22  
23  
24  
25  
26  
27  
28  
29  
30  
31  
32  
33  
34  
35  
36  
37  
38  
39  
40  
41  
42  
43  
44  
45  
46  
47  
48  
49  
50  
51  
52  
53  
54  
55  
56  
57  
58  
59  
60

From the control arm prescribers, 44 of them prescribed medication on the medication charts, with a median number of orders of 21 (range 1 - 85). The median percentage of orders in the control arm that contained at least one communication error per prescriber was 38 (range 0 - 100).

For peer review only

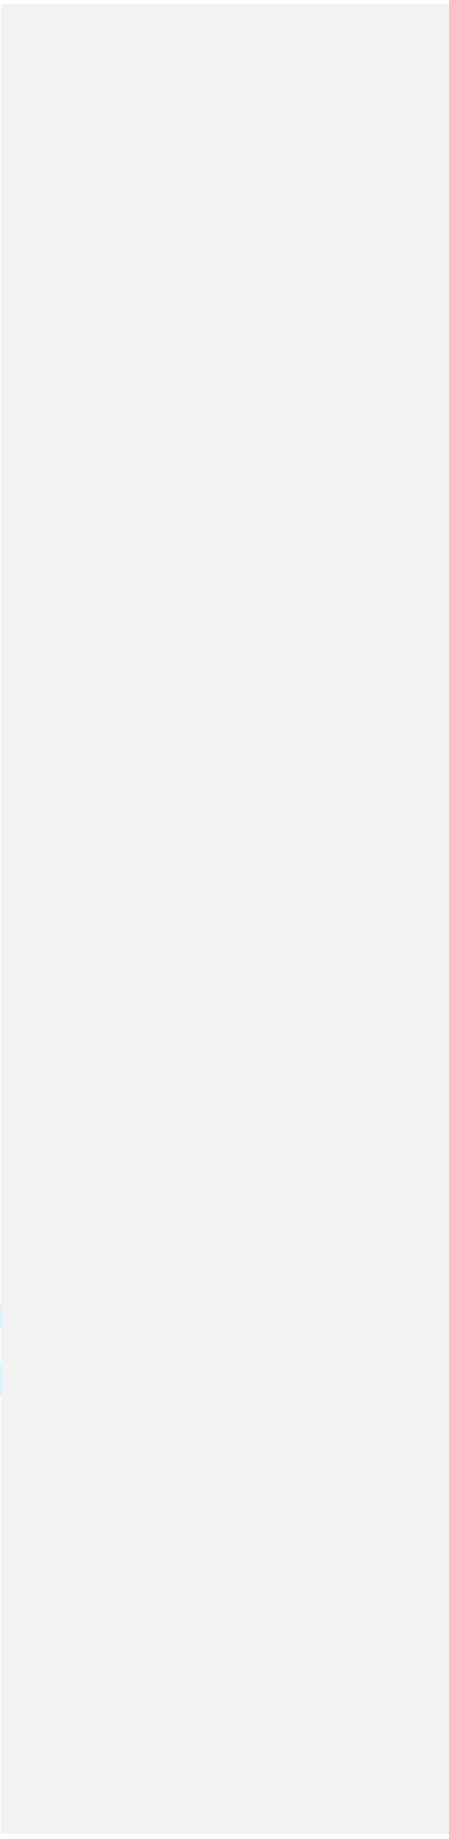

Table 5: Prescribing errors with an ambiguity in at least one component of the prescription

|                                                 | Control<br>Number of errors<br>(% of total orders) | Intervention<br>Number of errors<br>(% of total orders) | P value            |
|-------------------------------------------------|----------------------------------------------------|---------------------------------------------------------|--------------------|
| Total Orders                                    | 1034                                               | 904                                                     |                    |
| Orders with at Least One<br>Communication Error | 445(43)                                            | 208(23)                                                 | <0.001 $\square$ † |
| Prescribing<br>Communication Errors             | 667 (64.5)                                         | 229 (25.0)                                              | <0.001 †           |
| Prescribing Communication Errors                |                                                    |                                                         |                    |
| Drug name                                       | 23 (2.1)                                           | 0                                                       | <0.001 ‡           |
| Route                                           | 79 (7.6)                                           | 76 (8.4)                                                | 0.57 †             |
| Dose                                            | 48 (4.6)                                           | 5 (0.6)                                                 | <0.001 ‡           |
| Frequency                                       | 190 (18.4)                                         | 96 (10.6)                                               | <0.001 ‡           |
| Administration times<br>incorrect or missing    | 117 (14.9)<br>(781 orders)                         | 4 (0.5%)<br>(762 orders)                                | <0.001 ‡           |
| prn max dose missing                            | 178 (74.5)<br>(241 orders)                         | 47 (32.6)<br>(142 orders)                               | <0.001 ‡           |
| Slow Release not<br>specified                   | 15 (30.0)<br>(50 orders)                           | 1 (1.5)<br>(66 orders)                                  | <0.001 ‡           |
| Intermittent order not<br>specified             | 17 (57.5)<br>(30 orders)                           | 0<br>(38 orders)                                        | <0.001 ‡           |

$\square$  Logistic regression

† Chi-Square

‡ Fisher's Exact

### Venous Thromboembolism (VTE) Prophylaxis

Patients in the intervention arm were significantly more likely than controls to have appropriate VTE prophylaxis prescribed on the medication chart in PAC and to have documented VTE assessment (see Figure 5). On admission to the ward, approximately 90% of both intervention and control patients were prescribed appropriate VTE prophylaxis.

### DISCUSSION

This study has built on the findings from previous research of pharmacist prescribing in PAC settings, which have found improved accuracy of information gathered, and improved prescribing according to guidelines.[9,27] Similar studies of pharmacist interventions in different settings have shown improvements in clinical endpoints such as blood pressure control, increased appropriateness of prescribing and reductions in adverse drug events, such as warfarin associated bleeds.[28,29]

The traditional scope of practice for the PAC pharmacist consists of taking a medication history, using guidelines, clinical judgement and referral to the surgical team to suggest a plan for medications perioperatively, and providing this information for the RMOs to generate the medication charts. This scope has been extended in our study by providing an appropriately trained pharmacist to generate the medication chart and prescribe VTE prophylaxis, which has led to a significant reduction in omissions and prescribing errors, ensuring patients get the correct medication whilst in hospital. The evaluation of VTE prophylaxis prescribing was essential to assess the safety and appropriateness of initiation of a new medication, within guidelines, by the prescribing pharmacist. The results from this study have shown the prescribing to be as appropriate as usual care at the time the patient is admitted to the ward. Issues still remain with the prescribing, especially with the use of inappropriate abbreviations.[30] For example, a large proportion of communication errors in the intervention arm were due to the use of s/c to indicate subcutaneous, which has informed the researchers on future educational requirements of prescribers, especially with regards to safe prescribing.

[Electronic prescribing may be one solution to such errors involving legibility and inappropriate abbreviations, but studies have shown the systems introduce errors of their own.\[31\] These errors need to be fully assessed and appreciated if the quality of prescribing is to be improved by the introduction of computerised prescribing in to the healthcare system.](#)

1  
2  
3  
4  
5  
6  
7  
8  
9  
10  
11  
12  
13  
14  
15  
16  
17  
18  
19  
20  
21  
22  
23  
24  
25  
26  
27  
28  
29  
30  
31  
32  
33  
34  
35  
36  
37  
38  
39  
40  
41  
42  
43  
44  
45  
46  
47  
48  
49  
50  
51  
52  
53  
54  
55  
56  
57  
58  
59  
60

The results presented in this paper are part of a larger study, further work is required to assess the appropriateness of prescribing of medication charts and consumer participation of this new model of care.[23]

There are a number of limitations. Even though the trial was randomised, the total number of medications patients were taking was higher in the control arm (1364) compared to the intervention arm (983). The explanation for this is unknown but may in part be due to large randomisation block sizes, possibly meaning a number of consecutive patients were randomised to the control arm during clinic sessions where patients were more likely to have a higher burden of medication, for example during a vascular surgery clinic. There was more opportunity for omissions from the control arm as a result of more medications needing to be continued, and this was allowed for in the analysis.

RMOs in clinic during the study were aware of the intervention pharmacist's role, which may have led to an increased number and quality of medication charts prescribed in the control arm. Even with this potential effect, the study still showed a significant improvement in the safety and accuracy of medication charts.

Review of medication orders is not a role a RMO routinely undertakes. All RMOs were educated with regards to the requirement for a countersignature of pharmacist orders, and to amend anything as required prior to sign off. In the trial, 10 charts were amended – 5 changes were minor, 3 were addition of analgesics out of the pharmacist's prescribing scope and two changes actually resulted in inappropriate VTE prophylaxis. Despite the legislative changes, countersignature of pharmacist orders was a local requirement owing to the concern that junior doctors may become deskilled as a result of being removed from the prescribing process. However, the authors suggest that having an appropriately trained prescribing pharmacist in clinic, for the RMOs to use as guidance and to feedback on any prescribing errors, may increase the effectiveness of the learning environment.

Only having one pharmacist prescribing in the intervention arm, and multiple RMOs prescribing in the control arm is a potential source of bias, unavoidable where individual knowledge, skills and capabilities determine the quality of prescribing. It has been suggested medical undergraduate training may not prepare graduates to prescribe, which if addressed, may reduce this individual variance.[324] The model of care tested in our study was successful as we were able to reduce the variance within a group by training one individual pharmacist to manage medications perioperatively,

1  
2  
3  
4  
5  
6  
7 within a set scope of practice, and to include prescribing. It could be argued that the same results may  
8 have been obtained by providing the RMOs with extra prescribing training, and the improved  
9 performance may not necessarily be solely down to the introduction of a new professional discipline.  
10 The authors acknowledge the improved results may well be multi-factorial, but would also suggest  
11 that the underlying competencies of an experienced, 'advanced level' pharmacist, plus the prescribing  
12 training provided, have ensured appropriate competencies to prescribe in the model of care in which  
13 the prescribing took place.[33]

14  
15  
16  
17  
18 The order of consultation in the intervention arm was set by trial design. The order in the control arm  
19 was not set, which is a true reflection of usual care, where the patient could see the RMO prior to the  
20 pharmacist. This may have impacted on quality of control medication charts prescribed by the RMO,  
21 without information available from the pharmacist history. Whilst this could be classed as a limitation,  
22 this does reflect usual care in PAC and highlights the collaborative nature of the existing model of  
23 care.

24  
25  
26  
27  
28 The prescribing pharmacist was able to see control patients for usual care duties of a medication  
29 history, which may be perceived as introducing bias. However, as both pharmacists have received the  
30 same undergraduate and general level pharmacist training, the quality of medication history gathered  
31 for the RMO to use to prescribe the medication chart would be the same.

32  
33  
34  
35 Another limitation is the potential sustainability of the model of care, and capacity to train pharmacists  
36 as prescribers. This was only one pharmacist, in one hospital who had received special training to be  
37 able to prescribe. Evaluation of the requirements of non-medical prescribing courses is underway, but  
38 substantial further thought needs to be applied to ensure reproducibility of these results, in a larger  
39 sample, and consistent production of safe and effective prescribers.[342]

40  
41  
42  
43  
44 Further work is required to address the actual and perceived medico-legal implications for both  
45 doctors and pharmacists in such collaborations.

## 46 47 **CONCLUSION**

48  
49 Medication charts in the intervention arm were significantly safer and more accurate with regards to  
50 the patients' regular medications, than medication charts in the control arm.

51  
52  
53 There was no difference in appropriateness of VTE prophylaxis prescribing between arms on  
54 admission to the ward.



1  
2  
3  
4  
5  
6  
7 Our study has shown the pharmacist in PAC was able to effectively gather all the information required  
8 to collaboratively formulate a clinical decision in clinic within an agreed scope of practice, and  
9 communicate the decisions safely and accurately onto the medication chart.  
10

11 A collaborative doctor – pharmacist prescribing model in a PAC was as safe and accurate as usual  
12 care, in ensuring that patients were prescribed the medication required on admission for elective  
13 surgery.  
14  
15

### 16 **Acknowledgements**

17 The authors would like to acknowledge the following people, without whom the study would not have  
18 been possible.  
19

20 Professor Stephen Lynch, Chair of Surgery, Princess Alexandra Hospital

21 A/Prof Lynette Loy, Director of Pharmacy, Princess Alexandra Hospital

22 Ms Ching-Ting Hung, Senior Pharmacist, Princess Alexandra Hospital

23 Ms Renea Collins, Clinical Nurse Consultant, VTE Prophylaxis, Princess Alexandra Hospital

24 All of the staff in Pre Admission Clinic  
25

### 26 **Competing Interests**

27 There are no competing interests to be declared for any of the authors  
28

### 29 **Funding**

30 There was no external funding received for the study.  
31

### 32 **Copyright**

33 The Corresponding Author has the right to grant on behalf of all authors and does grant on behalf of  
34 all authors, an exclusive licence (or non-exclusive for government employees) on a worldwide basis to  
35 the BMJ Group and co-owners or contracting owning societies (where published by the BMJ Group  
36 on their behalf), and its Licensees to permit this article (if accepted) to be published in BMJ Quality  
37 and Safety and any other BMJ Group products and to exploit all subsidiary rights, as set out in our  
38 licence.  
39  
40  
41  
42  
43  
44  
45  
46  
47  
48  
49  
50  
51  
52  
53  
54  
55  
56  
57  
58  
59  
60

## REFERENCES

1. Coombes I, Reid C, McDougall D, et al. Pilot of a National Inpatient Medication Chart in Australia: improving prescribing safety and enabling prescribing training. *Br J Clin Pharmacol* 2011;72(2):338-349
2. Bates D, Cullen D, Laird N, et al. Incidence of Adverse Drug Events and Potential Adverse Drug Events: Implications for Prevention. *JAMA* 1995; 274(1):29-34.
3. Bobb A, Gleason K, Husch M, et al. The epidemiology of prescribing errors: the potential impact of computerized prescriber order entry. *Arch Intern Med* 2004;164:785-792.
4. Cornish P, Knowles S, Marchesano R, et al. Unintended Medication Discrepancies at the Time of Hospital Admission. *Arch Intern Med* 2005;165(4):424-429.
5. Bates D, Boyle D, Vander Villet M, et al. Relationship between Medication Errors and Adverse Drug Events. *J Gen Intern Med* 1995;10:199-205.
6. Dean B, Barber N, Schacter M. What is a prescribing error? *Quality in Health Care* 2000; 9: 232-237.
7. Aronson JK. Balanced prescribing. *Br J Clin Pharmacol* 2006;62:629-32.
8. Barber N, Rawlins M, Dean Franklin B. Reducing prescribing error: competence, control, and culture. *Qual Saf Health Care* 2003;12:i29-32.
9. Stowasser D. Medication Information and health outcomes - Development and evaluation of a medication liaison service, in School of Pharmacy 2000, University of Queensland: Brisbane.
10. Nagpal K, Arora S, Vats A, et al. Failures in communication and information transfer across the surgical care pathway: interview study. *BMJ Qual Saf* 2012;21:843-849
11. Bhanji, A, Fallon K, LeBlanc S. Pharmacy Involvement in a Surgery Preadmission Program. *Am J Health Syst Pharm* 1993;50:483-486.

12. Wright P, Khachi H, Vercaeren S, et al. Medicines reconciliation in preadmission clinics can improve medicines prescribing. *Pharmacy in Practice* 2008;18(2):p44-46.
13. Crown J. Review of prescribing, supply and administration of medicines. Final report. 1999: London.
14. Courtenay M, Carey N. Nurse independent prescribing and nurse supplementary prescribing practice: National survey. *J Adv Nurs* 2008;61(3):291-299.
15. Australian Institute of Health and Welfare. Medical labour force 2005. Canberra: AIHW 2008 (AIHW Cat. no. HWL 41, Series number 40)
16. National Health Workforce Taskforce. *Health Workforce in Australia and Factors for Current Shortages* 2009  
<http://www.nhwt.gov.au/documents/NHWT/The%20health%20workforce%20in%20Australia%20and%20factors%20influencing%20current%20shortages.pdf> (accessed Jan 2012)
17. Brooks P, Lapsley H, Butt D. *Medical workforce issues in Australia: 'tomorrow's doctors - too few, too far'*. *Med J Aust* 2003(179): 206-8.
18. Health Workforce Australia, *HWA Work Plan 2011/12*. Approved by Australian Health Ministers' Conference, 26 September 2011
19. National Health Workforce Research and Planning Collaboration, *Non-Medical Prescribing. An exploration of likely nature of, and contingencies for, developing a nationally consistent approach to prescribing by non-medical health professionals*. Final Report. 1 June 2010.
20. Bessell T, Marriott J, Emmerton L, et al. Improving Australians' Access to Prescription Medicines: Development of Pharmacy Practice Models. Final Report. 2005.
21. Bhanbhro S, Drennan V, Grant R, et al. Assessing the contribution of prescribing in primary care by nurses and professionals allied to medicine: a systematic review of the literature. *BMC Health Serv Res* 2011;11:330

- 1  
2  
3  
4  
5  
6  
7 22. Van Der Weyden, M. Doctor displacement: a political agenda or a health care imperative?  
8 *Med J Aust* 2008;189(11/12):608-609.  
9  
10  
11 23. National Health Performance Committee, National Health Performance Framework Report, Q.  
12 Health, Editor. 2001: Brisbane.  
13  
14  
15 24. Hale A, Nissen L. Does the Consultation Order in a Multidisciplinary Elective Surgical Pre-  
16 Admission Clinic Influence the Frequency and Quality of Prescribing for Inpatient Medication  
17 Charts? Australasian Pharmaceutical Science Association, Brisbane 6<sup>th</sup> – 9<sup>th</sup> Dec 2010  
18  
19  
20 25. General Pharmaceutical Council, Accreditation of Independent Prescribing Programmes.  
21 2010, General Pharmaceutical Council.  
22  
23  
24 26. Australia and New Zealand Working Party on the Management and Prevention of Venous  
25 Thromboembolism: *Prevention of venous thromboembolism best practice guidelines for*  
26 *Australia and New Zealand*. 4th edition. Sydney, Health Education and Management  
27 Innovations; 2007  
28  
29  
30  
31  
32 27. Marotti S, Kerridge R, Grimer M. A randomised controlled trial of pharmacist medication  
33 histories and supplementary prescribing on medication errors on postoperative medications.  
34 *Journal of Anaesthesia and Intensive Care* 2011; 29(6):1064-1070  
35  
36  
37  
38  
39 28. Reid F, Murray P, Storrie M. Implementation of a Pharmacist Led Clinic for Hypertensive  
40 Patients in Primary Care – A Pilot Study. *Pharmacy World and Science* 2005; 27(3):202-207  
41  
42  
43  
44 29. Burns, N. Evaluation of warfarin dosing by pharmacists for elderly medical in-patients. *Pharm*  
45 *World Sci* 2004;26(4):232-237  
46  
47  
48  
49 30. Australian Commission on Safety and Quality in Healthcare. National terminology,  
50 abbreviations and symbols to be used in the prescribing and administering of medicines in  
51 Australian hospitals. October 2006  
52  
53  
54  
55  
56  
57  
58  
59  
60

1  
2  
3  
4  
5  
6  
7 31. Koppel R, Metlay J, Cohen A. Role of Computerized Physician Order Entry Systems in  
8 Facilitating Medication Errors. *JAMA* 2005; 292(10):1197-1203

Formatted: Font: Italic

11 324. Pillans P. How prepared are medical graduates to begin prescribing? *Intern Med J* 2009; 39:  
12 425-7.

15 33. Morris S, Coombes I. The right to prescribe: towards core prescribing competencies for all  
16 prescribers. *Australian Prescriber* 2011;34(5):126

Formatted: Font: Italic

19 342. Coombes I, Wheeler A, Hale A. Evaluation of effectiveness and relevance of Safe Medication  
20 Practice Tutorials as a course for pharmacist prescribers in New Zealand. *Pharmacy*  
21 *Education* 2011;11(1):95-98

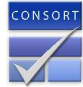

## CONSORT 2010 checklist of information to include when reporting a randomised trial\*

| Section/Topic                    | Item No | Checklist item                                                                                                                                                                              | Reported on page No |
|----------------------------------|---------|---------------------------------------------------------------------------------------------------------------------------------------------------------------------------------------------|---------------------|
| <b>Title and abstract</b>        |         |                                                                                                                                                                                             |                     |
|                                  | 1a      | Identification as a randomised trial in the title                                                                                                                                           | 1                   |
|                                  | 1b      | Structured summary of trial design, methods, results, and conclusions (for specific guidance see CONSORT for abstracts)                                                                     | 1                   |
| <b>Introduction</b>              |         |                                                                                                                                                                                             |                     |
| Background and objectives        | 2a      | Scientific background and explanation of rationale                                                                                                                                          | 3                   |
|                                  | 2b      | Specific objectives or hypotheses                                                                                                                                                           | 4                   |
| <b>Methods</b>                   |         |                                                                                                                                                                                             |                     |
| Trial design                     | 3a      | Description of trial design (such as parallel, factorial) including allocation ratio                                                                                                        | 5                   |
|                                  | 3b      | Important changes to methods after trial commencement (such as eligibility criteria), with reasons                                                                                          |                     |
| Participants                     | 4a      | Eligibility criteria for participants                                                                                                                                                       | 5                   |
|                                  | 4b      | Settings and locations where the data were collected                                                                                                                                        | 5                   |
| Interventions                    | 5       | The interventions for each group with sufficient details to allow replication, including how and when they were actually administered                                                       | 6                   |
| Outcomes                         | 6a      | Completely defined pre-specified primary and secondary outcome measures, including how and when they were assessed                                                                          | 7                   |
|                                  | 6b      | Any changes to trial outcomes after the trial commenced, with reasons                                                                                                                       | N/A                 |
| Sample size                      | 7a      | How sample size was determined                                                                                                                                                              | 5                   |
|                                  | 7b      | When applicable, explanation of any interim analyses and stopping guidelines                                                                                                                | N/A                 |
| Randomisation:                   |         |                                                                                                                                                                                             |                     |
| Sequence generation              | 8a      | Method used to generate the random allocation sequence                                                                                                                                      | 5                   |
|                                  | 8b      | Type of randomisation; details of any restriction (such as blocking and block size)                                                                                                         | 5                   |
| Allocation concealment mechanism | 9       | Mechanism used to implement the random allocation sequence (such as sequentially numbered containers), describing any steps taken to conceal the sequence until interventions were assigned | 5                   |
| Implementation                   | 10      | Who generated the random allocation sequence, who enrolled participants, and who assigned participants to interventions                                                                     | 5                   |
| Blinding                         | 11a     | If done, who was blinded after assignment to interventions (for example, participants, care providers, those                                                                                | N/A                 |

|                                                      |     |                                                                                                                                                   |       |
|------------------------------------------------------|-----|---------------------------------------------------------------------------------------------------------------------------------------------------|-------|
|                                                      |     | assessing outcomes) and how                                                                                                                       |       |
|                                                      | 11b | If relevant, description of the similarity of interventions                                                                                       |       |
| Statistical methods                                  | 12a | Statistical methods used to compare groups for primary and secondary outcomes                                                                     | 9     |
|                                                      | 12b | Methods for additional analyses, such as subgroup analyses and adjusted analyses                                                                  | 12    |
| <b>Results</b>                                       |     |                                                                                                                                                   |       |
| Participant flow (a diagram is strongly recommended) | 13a | For each group, the numbers of participants who were randomly assigned, received intended treatment, and were analysed for the primary outcome    | 10    |
|                                                      | 13b | For each group, losses and exclusions after randomisation, together with reasons                                                                  | Fig 1 |
| Recruitment                                          | 14a | Dates defining the periods of recruitment and follow-up                                                                                           | 5     |
|                                                      | 14b | Why the trial ended or was stopped                                                                                                                | N/A   |
| Baseline data                                        | 15  | A table showing baseline demographic and clinical characteristics for each group                                                                  | 10    |
| Numbers analysed                                     | 16  | For each group, number of participants (denominator) included in each analysis and whether the analysis was by original assigned groups           | 10    |
| Outcomes and estimation                              | 17a | For each primary and secondary outcome, results for each group, and the estimated effect size and its precision (such as 95% confidence interval) | 11,12 |
|                                                      | 17b | For binary outcomes, presentation of both absolute and relative effect sizes is recommended                                                       |       |
| Ancillary analyses                                   | 18  | Results of any other analyses performed, including subgroup analyses and adjusted analyses, distinguishing pre-specified from exploratory         | 12    |
| Harms                                                | 19  | All important harms or unintended effects in each group (for specific guidance see CONSORT for harms)                                             | N/A   |
| <b>Discussion</b>                                    |     |                                                                                                                                                   |       |
| Limitations                                          | 20  | Trial limitations, addressing sources of potential bias, imprecision, and, if relevant, multiplicity of analyses                                  | 14,15 |
| Generalisability                                     | 21  | Generalisability (external validity, applicability) of the trial findings                                                                         | 15    |
| Interpretation                                       | 22  | Interpretation consistent with results, balancing benefits and harms, and considering other relevant evidence                                     | 14,15 |
| <b>Other information</b>                             |     |                                                                                                                                                   |       |
| Registration                                         | 23  | Registration number and name of trial registry                                                                                                    | 17    |
| Protocol                                             | 24  | Where the full trial protocol can be accessed, if available                                                                                       | 17    |
| Funding                                              | 25  | Sources of funding and other support (such as supply of drugs), role of funders                                                                   | N/A   |

\*We strongly recommend reading this statement in conjunction with the CONSORT 2010 Explanation and Elaboration for important clarifications on all the items. If relevant, we also recommend reading CONSORT extensions for cluster randomised trials, non-inferiority and equivalence trials, non-pharmacological treatments, herbal interventions, and pragmatic trials. Additional extensions are forthcoming: for those and for up to date references relevant to this checklist, see [www.consort-statement.org](http://www.consort-statement.org).

1  
2  
3  
4  
5  
6  
7  
8  
9  
10  
11  
12  
13  
14  
15  
16  
17  
18  
19  
20  
21  
22  
23  
24  
25  
26  
27  
28  
29  
30  
31  
32  
33  
34  
35  
36  
37  
38  
39  
40  
41  
42  
43  
44  
45  
46  
47  
48  
49  
50  
51  
52  
53  
54  
55  
56  
57  
58  
59  
60

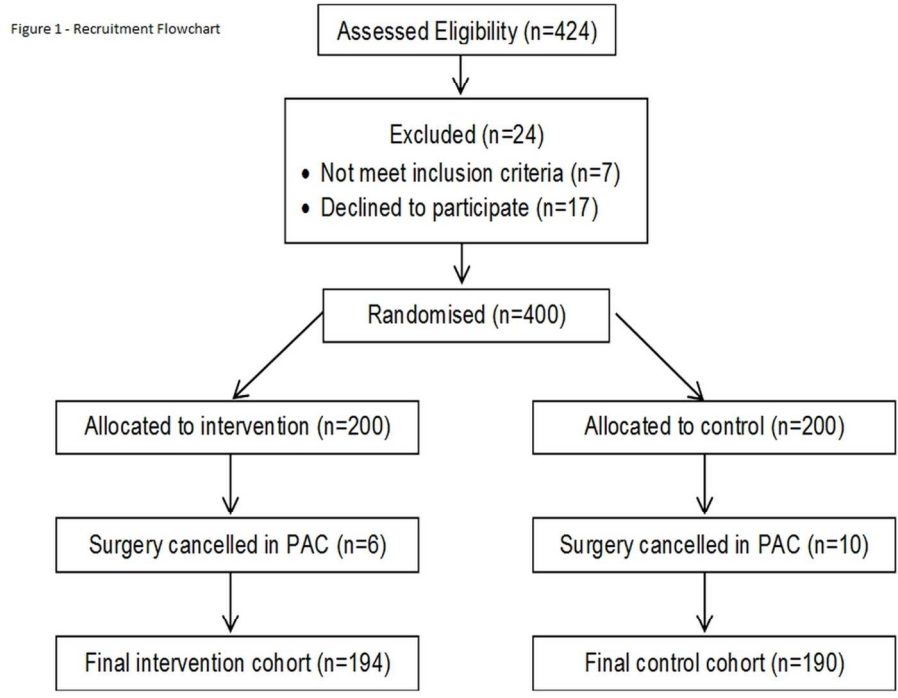

Randomisation Flowchart  
119x90mm (300 x 300 DPI)

Review only



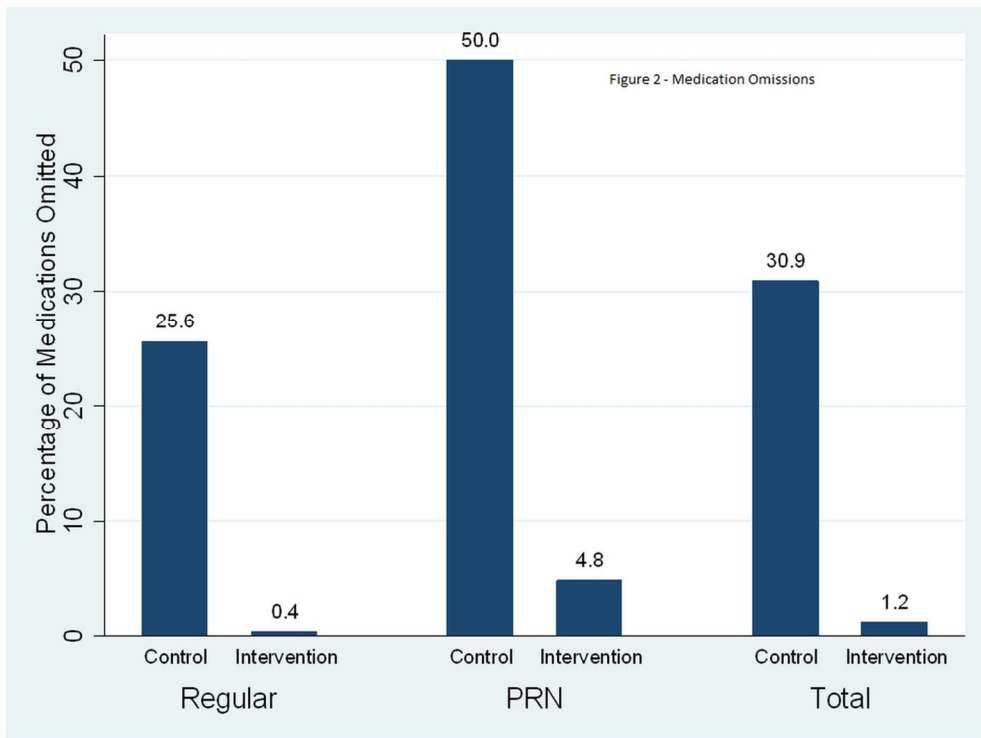

Percentage of Medications Omitted  
119x90mm (300 x 300 DPI)

Review only

1  
2  
3  
4  
5  
6  
7  
8  
9  
10  
11  
12  
13  
14  
15  
16  
17  
18  
19  
20  
21  
22  
23  
24  
25  
26  
27  
28  
29  
30  
31  
32  
33  
34  
35  
36  
37  
38  
39  
40  
41  
42  
43  
44  
45  
46  
47  
48  
49  
50  
51  
52  
53  
54  
55  
56  
57  
58  
59  
60

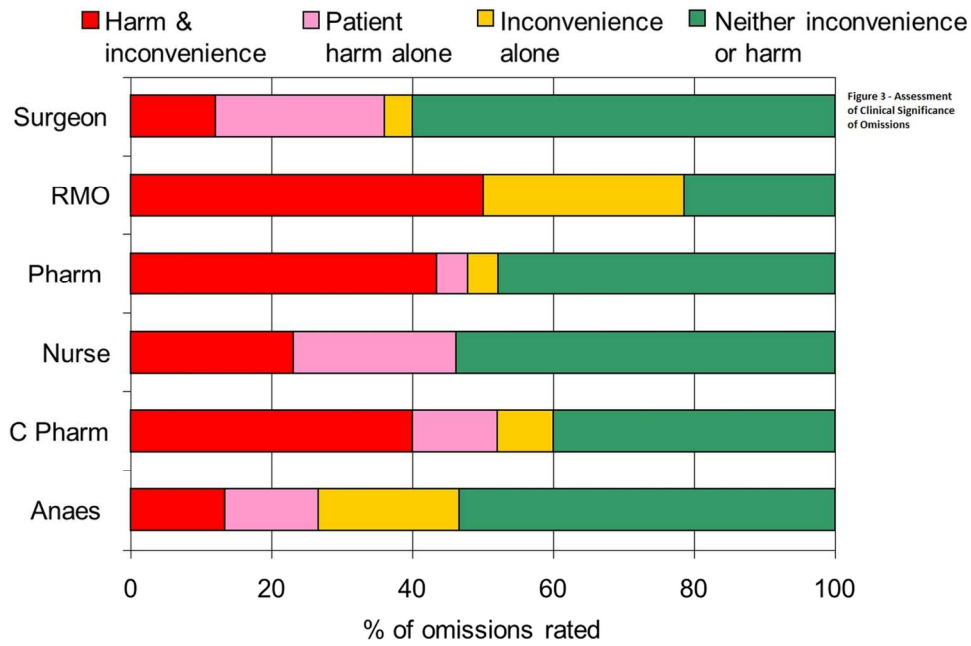

Figure 3 - Assessment of Clinical Significance of Omissions

Assessment of Clinical Significance of Omissions  
135x90mm (300 x 300 DPI)

Review only

1  
2  
3  
4  
5  
6  
7  
8  
9  
10  
11  
12  
13  
14  
15  
16  
17  
18  
19  
20  
21  
22  
23  
24  
25  
26  
27  
28  
29  
30  
31  
32  
33  
34  
35  
36  
37  
38  
39  
40  
41  
42  
43  
44  
45  
46  
47  
48  
49  
50  
51  
52  
53  
54  
55  
56  
57  
58  
59  
60

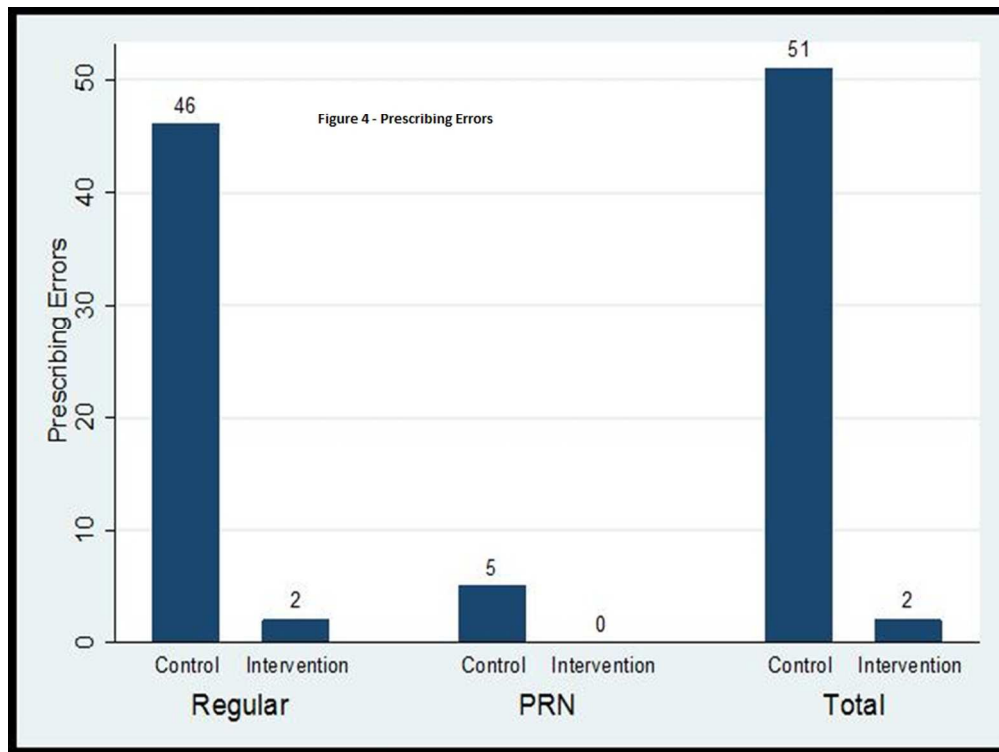

Numbers of Prescribing Errors  
119x90mm (300 x 300 DPI)

ew only

1  
2  
3  
4  
5  
6  
7  
8  
9  
10  
11  
12  
13  
14  
15  
16  
17  
18  
19  
20  
21  
22  
23  
24  
25  
26  
27  
28  
29  
30  
31  
32  
33  
34  
35  
36  
37  
38  
39  
40  
41  
42  
43  
44  
45  
46  
47  
48  
49  
50  
51  
52  
53  
54  
55  
56  
57  
58  
59  
60

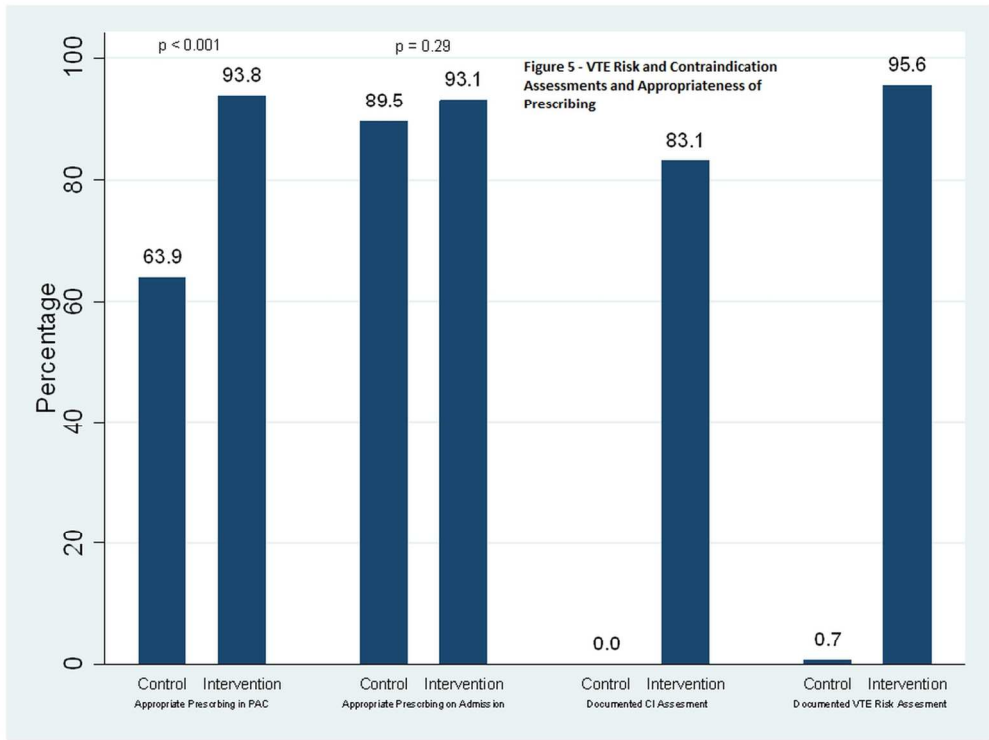

VTE Prophylaxis Assessments and Prescribing  
119x90mm (300 x 300 DPI)

ew only
